# Supplementary material for: Highly time-resolved characterization of carbonaceous aerosols using a two-wavelength Sunset thermo/optical carbon analyzer
Source: Copernicus journal article supplement (doi:10.5194/amt-2020-341), 2020-11-09
Supplement: Supplementary file 1 [file amt-2020-341-supplement.pdf]

1 **Content of this file**

2

3 **Tables**

4 **Table S1.** Comparisons of the concentrations of OC and EC between different cities in China and  
5 around the world.

6 **Table S2.** Statistics on the meteorological factors in four seasons at NUIST site during the study  
7 period.

8

9 **Figures**

10 **Figure S1.** Correlations between the real-time OC, EC and TC concentrations and sampling OC,  
11 EC and TC concentrations during the corresponding periods.

12 **Figure S2.** dEC/OC variation at different intervals of OC/EC ratios in spring (a), summer (b),  
13 autumn (c) and winter (d).

14 **Figure S3.** Time variations of OC, EC, dEC, dEC/OC, OC/EC and fire points obtained from the  
15 Fire Information for Resource Management System (FIRMS) derived from the Moderate  
16 Resolution Imaging Spectroradiometer (MODIS).

17 **Figure S4.** 48-h back trajectories at 500 m from the study site from 8 June 2015 to 9 June 2015(a),  
18 11 June 2015 to 12 June 2015 (b), respectively and from 7 February 2016 to 10 February 2016 (c)  
19 and 26 February 2016 to 27 February 2016 (d), respectively.

20

21 **Reference for the supplement**

22 **Table S1.** Comparisons of the concentrations of OC and EC between different cities in China and  
 23 around the world.

| Site         | Sampling period   | OC   | EC   | OC/EC | Method | References              |
|--------------|-------------------|------|------|-------|--------|-------------------------|
| Beijing      | Mar 2013-Feb 2014 | 14.0 | 4.1  | 3.4   | TOT    | (Ji et al., 2016)       |
| Shanghai     | Oct 2005-Jul 2006 | 14.7 | 2.8  | 5.0   | TOT    | (Feng et al., 2009)     |
| Chengdu      | May 2012-Apr 2013 | 19.0 | 4.6  | 4.3   | TOT    | (Chen et al., 2014)     |
| Chongqing    | May 2012-Apr 2013 | 15.2 | 4.0  | 3.8   | TOT    | (Chen et al., 2014)     |
| Nanjing      | Annual 2014       | 5.7  | 3.2  | 1.8   | TOT    | (Chen et al., 2017)     |
| Guangzhou    | Mar 2012–Feb 2013 | 6.1  | 0.8  |       | TOT    | (Lai et al., 2016)      |
| Hongkong     | Aug 2011-May 2012 | 3.0  | 1.9  |       | TOT    | (Zhou et al., 2014)     |
| Mount Tai    | Mar-Apr 2007      | 6.1  | 1.8  | 5.0   | TOT    | (Wang et al., 2011)     |
| Mount Tai    | Jun-Jul 2007      | 5.1  | 1.0  | 6.2   | TOT    | (Wang et al., 2011)     |
| Mount Heng   | Mar-May 2009      | 3.0  | 0.5  | 5.2   | TOT    | (Zhou et al., 2012)     |
| Mexico       | Mar 2006          | 6.4  | 2.1  | 4.5   | TOT    | (Yu et al., 2009)       |
| Delhi        | Nov 2010-Feb 2011 | 54.1 | 10.4 | 5.2   | TOT    | (Tiwari et al., 2012)   |
| Philadelphia | Jul 2002-Aug 2002 | 4.8  | 0.4  | 18.7  | TOT    | (Jeong et al., 2004)    |
| Rochester    | Jun 2002          | 9.2  | 0.3  | 23.6  | TOT    | (Jeong et al., 2004)    |
| Italy        | Nov 2011–Mar 2012 | 9.9  | 1.3  | 6.8   | TOT    | (Costa et al., 2016)    |
| Italy        | Oct 2012–Mar 2013 | 6.9  | 2.2  | 3.3   | TOT    | (Costa et al., 2016)    |
| Spain        | Dec 2011          | 3.6  | 1.1  | 4.7   | TOT    | (Escudero et al., 2015) |
| Nanjing      | Jun 2015-Aug 2016 | 8.6  | 2.9  | 3.6   | TOT    | This study              |

24

25 **Table S2.** Statistics on the meteorological factors in four seasons at NUIST site during the study  
26 period.

|        | Atmospheric<br>Pressure<br>(hPa) | Relative<br>Humidity<br>(%) | Temperature<br>(°C) | Wind Speed<br>(m s <sup>-1</sup> ) | Total<br>Precipitation<br>(mm) |
|--------|----------------------------------|-----------------------------|---------------------|------------------------------------|--------------------------------|
| Spring | 1009.9                           | 66.0                        | 16.8                | 1.9                                | 256.3                          |
| Summer | 1000.7                           | 72.6                        | 26.7                | 1.4                                | 586.0                          |
| Autumn | 1014.6                           | 71.0                        | 19.5                | 1.7                                | 218.5                          |
| Winter | 1027.0                           | 63.9                        | 5.7                 | 1.7                                | 82.1                           |

27

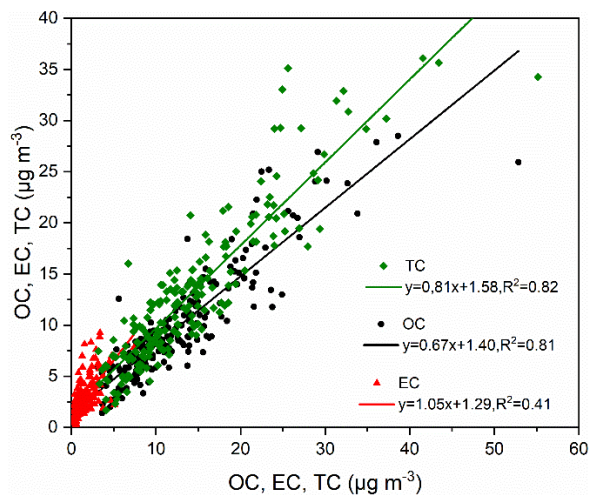

28  
 29 **Figure S1.** Correlations between the real-time OC, EC and TC concentrations and sampling OC,  
 30 EC and TC concentrations during the corresponding periods.

31

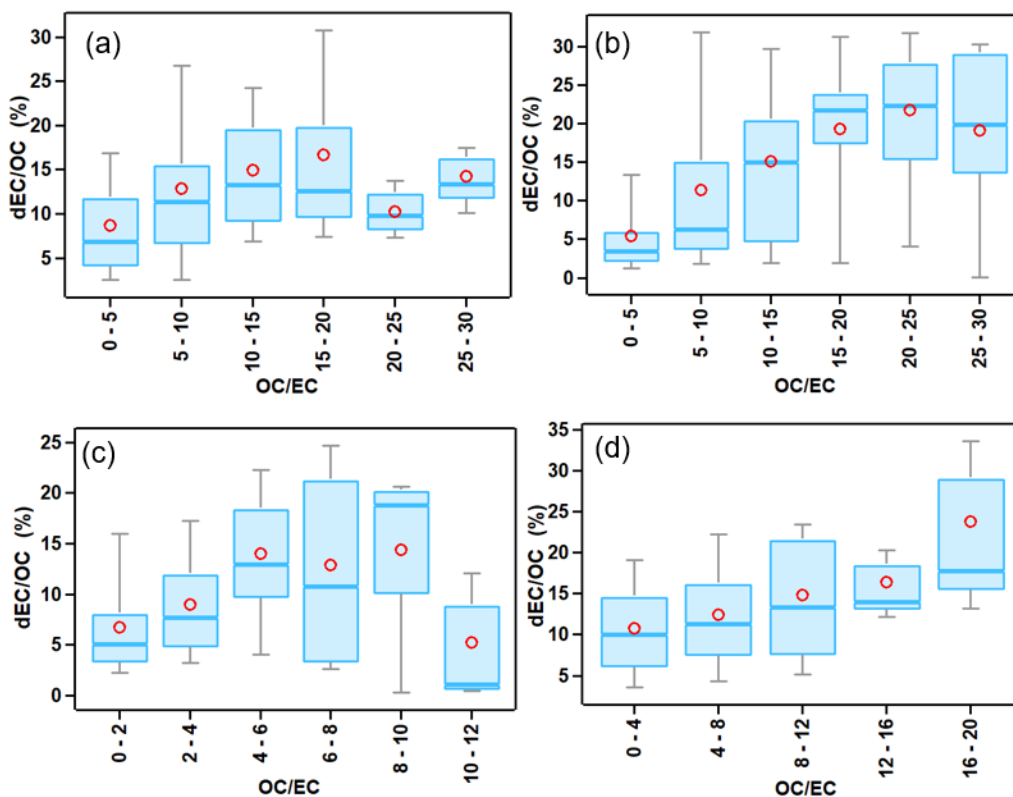

32  
 33 **Figure S2.** dEC/OC variation at different intervals of OC/EC ratios in spring (a), summer (b),  
 34 autumn (c) and winter (d).

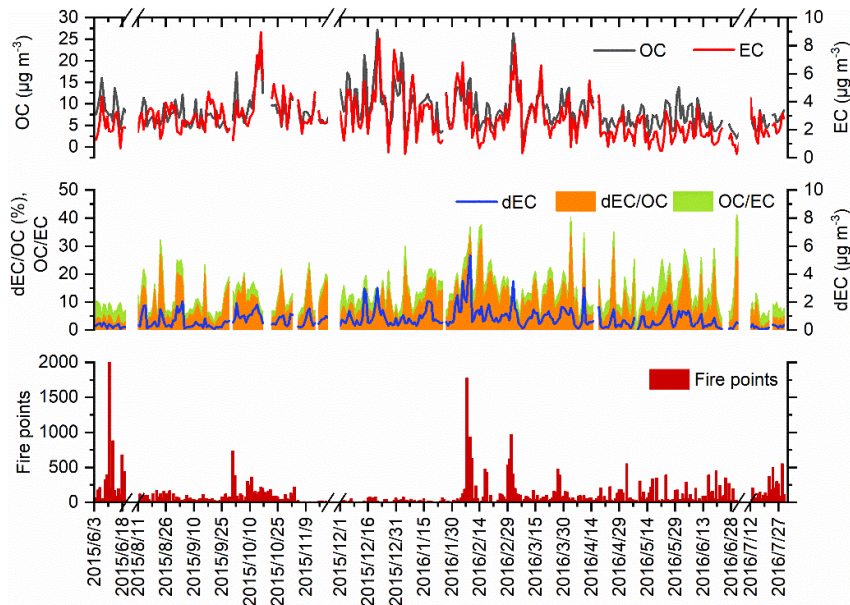

35  
 36 **Figure S3.** Time variations of OC, EC, dEC, dEC/OC, OC/EC and fire points obtained from the  
 37 Fire Information for Resource Management System (FIRMS) derived from the Moderate  
 38 Resolution Imaging Spectroradiometer (MODIS).

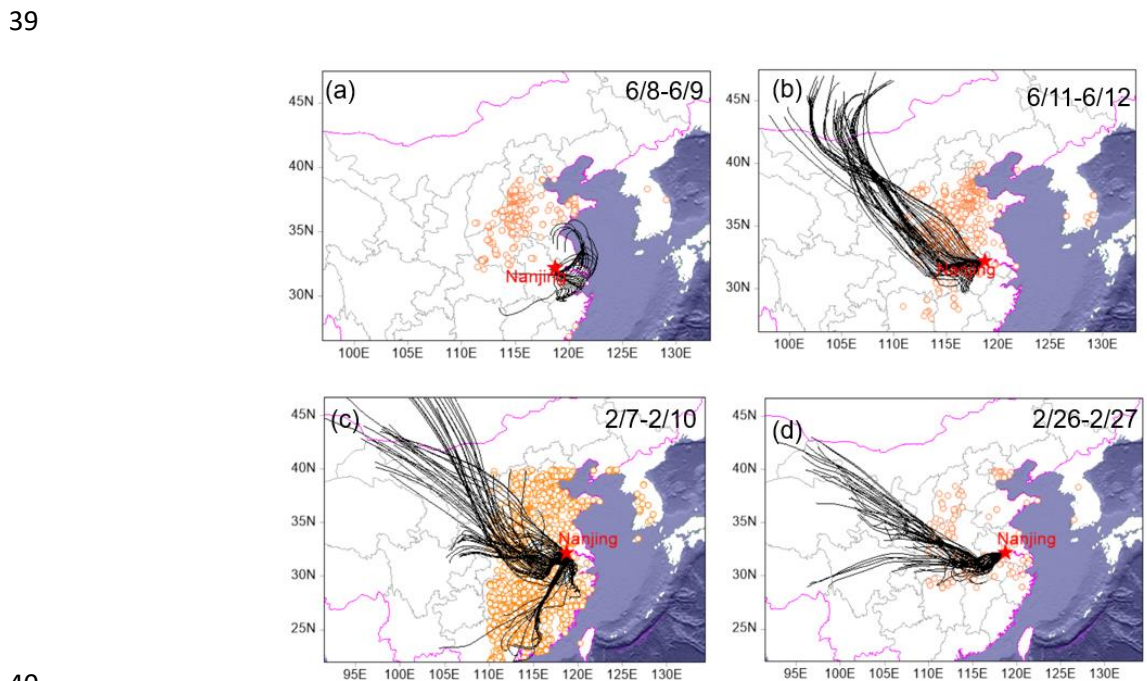

40  
 41 **Figure S4.** 48-h back trajectories at 500 m from the study site from 8 June 2015 to 9 June 2015(a),  
 42 11 June 2015 to 12 June 2015 (b), respectively and from 7 February 2016 to 10 February 2016 (c)  
 43 and 26 February 2016 to 27 February 2016 (d), respectively.

#### 44 **References**

- 45 Chen, D., Cui, H., Zhao, Y., Yin, L., Lu, Y., and Wang, Q.: A two-year study of carbonaceous  
46 aerosols in ambient PM<sub>2.5</sub> at a regional background site for western Yangtze River Delta, China,  
47 *Atmos. Res.*, 183, 351-361, 10.1016/j.atmosres.2016.09.004, 2017.
- 48 Chen, Y., Xie, S., Luo, B., and Zhai, C.: Characteristics and origins of carbonaceous aerosol in the  
49 Sichuan Basin, China, *Atmos. Environ.*, 94, 215-223, 10.1016/j.atmosenv.2014.05.037, 2014.
- 50 Costa, V., Bacco, D., Castellazzi, S., Ricciardelli, I., Vecchiotti, R., Zigola, C., and Pietrogrande,  
51 M. C.: Characteristics of carbonaceous aerosols in Emilia-Romagna (Northern Italy) based on two  
52 fall/winter field campaigns, *Atmos. Res.*, 167, 100-107, 10.1016/j.atmosres.2015.07.020, 2016.
- 53 Escudero, M., Viana, M., Querol, X., Alastuey, A., Diez Hernandez, P., Garcia Dos Santos, S.,  
54 and Anzano, J.: Industrial sources of primary and secondary organic aerosols in two urban  
55 environments in Spain, *Environ. Sci. Pollut. Res. Int.*, 22, 10413-10424, 10.1007/s11356-015-  
56 4228-x, 2015.
- 57 Feng, Y., Chen, Y., Guo, H., Zhi, G., Xiong, S., Li, J., Sheng, G., and Fu, J.: Characteristics of  
58 organic and elemental carbon in PM<sub>2.5</sub> samples in Shanghai, China, *Atmos. Res.*, 92, 434-442,  
59 10.1016/j.atmosres.2009.01.003, 2009.
- 60 Jeong, C.-H., Lee, D.-W., Kim, E., and Hopke, P. K.: Measurement of real-time PM<sub>2.5</sub> mass,  
61 sulfate, and carbonaceous aerosols at the multiple monitoring sites, *Atmos. Environ.*, 38, 5247-  
62 5256, 10.1016/j.atmosenv.2003.12.046, 2004.
- 63 Ji, D., Zhang, J., He, J., Wang, X., BoPanga, Liua, Z., Wang, L., and Wang, Y.: Characteristics of  
64 atmospheric organic and elemental carbon aerosols in urban Beijing, China, *Atmos. Environ.*, 293-  
65 306, 10.1016/j.atmosenv.2015.11.020, 2016.
- 66 Lai, S., Zhao, Y., Ding, A., Zhang, Y., Song, T., Zheng, J., Ho, K. F., Lee, S.-C., and Zhong, L.:  
67 Characterization of PM<sub>2.5</sub> and the major chemical components during a 1-year campaign in rural  
68 Guangzhou, Southern China, *Atmos. Res.*, 167, 208-215, 10.1016/j.atmosres.2015.08.007, 2016.
- 69 Tiwari, S., Srivastava, A. K., Bisht, D. S., Safai, P. D., and Parmita, P.: Assessment of  
70 carbonaceous aerosol over Delhi in the Indo-Gangetic Basin: characterization, sources and  
71 temporal variability, *Nat. Hazards.*, 65, 1745-1764, 10.1007/s11069-012-0449-1, 2012.
- 72 Wang, Z., Wang, T., Gao, R., Xue, L., Guo, J., Zhou, Y., Nie, W., Wang, X., Xu, P., Gao, J., Zhou,  
73 X., Wang, W., and Zhang, Q.: Source and variation of carbonaceous aerosols at Mount Tai, North

74 China: Results from a semi-continuous instrument, *Atmos. Environ.*, 45, 1655-1667,  
75 10.1016/j.atmosenv.2011.01.006, 2011.

76 Yu, X. Y., Cary, R. A., and Laulainen, N. S.: Primary and secondary organic carbon downwind of  
77 Mexico City, *Atmos. Chem. Phys.*, 9, 6793–6814, 2009.

78 Zhou, S., Wang, Z., Gao, R., Xue, L., Yuan, C., Wang, T., Gao, X., Wang, X., Nie, W., Xu, Z.,  
79 Zhang, Q., and Wang, W.: Formation of secondary organic carbon and long-range transport of  
80 carbonaceous aerosols at Mount Heng in South China, *Atmospheric Environment*, 63, 203-212,  
81 10.1016/j.atmosenv.2012.09.021, 2012.

82 Zhou, S., Wang, T., Wang, Z., Li, W., Xu, Z., Wang, X., Yuan, C., Poon, C. N., Louie, P. K. K.,  
83 Luk, C. W. Y., and Wang, W.: Photochemical evolution of organic aerosols observed in urban  
84 plumes from Hong Kong and the Pearl River Delta of China, *Atmos. Environ.*, 88, 219-229,  
85 10.1016/j.atmosenv.2014.01.032, 2014.

86
