# Supplementary material for: Highly time-resolved characterization of carbonaceous aerosols using a two-wavelength Sunset thermo/optical carbon analyzer
Source: Copernicus journal article supplement (doi:10.5194/amt-2020-341), 2020-11-09
Supplement: Supplementary file [file amt-2020-341-AC1-supplement.pdf]

## Response to reviewer's comments

We thank the referee for the useful comments and suggestions which have helped us to improve the manuscript. Our point-by-point responses are below. The referee' comments are in black font and our responses are in blue font.

19-Feb-2021

Title: Highly time-resolved characterization of carbonaceous aerosols using a two-wavelength Sunset thermo/optical carbon analyzer

Author(s): Mengying Bao et al.

MS No.: amt-2020-341

Interactive comment on “Highly time-resolved characterization of carbonaceous aerosols using a two-wavelength Sunset thermo/optical carbon analyzer” by Mengying Bao et al.

### **Anonymous Referee #2**

Received and published: 20 November 2020

Manuscript by Bao et al. describes the annual measurement of carbonaceous aerosols in Nanjing, China, using a two-wavelength Sunset Lab. semi-online analyzer. If I understand well, this is the first article where a semi-online Sunset EC/OC analyzer with a dual laser is presented. The manuscript thus shows both an improved instrument for measuring of EC/OC and a demonstration of the newly measured value dEC, which is presented as an alternative indicator to brown carbon (BrC) measurement. From this point of view, the publication in AMT is logical. However, I have a few comments and recommendations.

**R: We thank the reviewer for the brief summary and positive comments on our paper.**

General comments:

Since this is the first described use of a two-wavelength analyzer, the article should contain more information about instrument itself. It means how it differs from previous versions of the

instrument, what software is used to evaluate data, and authors also should provide a Figure with an example of a typical analysis. What are the differences, for example, in comparison with the 7-wave offline DRI analyzer (Chen et al., 2015). It is also not clear from the description in the methodology how the split between OC and EC is determined. Are there any corrections used?

R: We appreciate the reviewer for the general suggestions on the description of our instrument. The most important change in our instrument was that “In this study, we modified the Sunset instrument to a two-wavelength (658 nm and 405 nm) Sunset carbon analyzer by adding one more violet diode laser at  $\lambda=405$  nm. The violet diode laser together with the red diode laser, focus through the sample chamber then the laser beam passed through the filter to correct for the pyrolysis-induced error.” This information was shown in lines 122-126 in the introduction section.

We agree with the reviewer that we need to add a figure with an example of a typical analysis. We added the sentence “The split point between OC and EC was detected by the RTCalc731 software provided by Sunset Lab. The principle was same as the traditional Sunset carbon analyzer (Birch and Cary, 1996). An example thermogram of sample analysis using the two-wavelength Sunset semi-continuous carbon analyzer was shown in Fig. 2. During the sample analysis, the laser beam at 658 nm and 405 nm were both sent through the filter and the transmitted light signal were monitored to correct the undesired formation of pyrolyzed carbon (PyrC) and then to determine the split point of OC and EC at both two wavelengths.” in lines 170-176. The determination of the split point was conducted same as other researches, so we didn’t do any corrections..

In our opinion, compared with the work reported by Chen et al. (2015), the most important meaning of our work is that we can provide the observation of long-term real-time dEC mass concentrations and the dEC data can be further applied in the future in the research of BrC. We added the sentence in lines 126-131 as “Previous work reported by Chen et al. (2015) as mentioned above was integrating the optical instrument like the aethalometer to the traditional OC/EC analyzer, in this way, they provided the light absorption contributions of BC and BrC. The enhanced carbon analyzer provided new insight into more accurate OC and EC measurements. Their work was conducted in offline mode, based on their work, our instrument can get the real-time OC and EC mass concentrations both at 658 nm and 405 nm.”

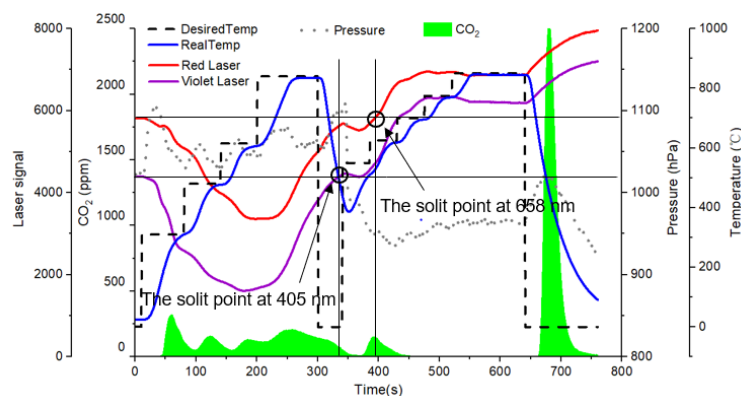

Figure 2. Example thermogram of sample analysis using the two-wavelength Sunset semi-continuous carbon analyzer.

How much of the dEC roughly overlaps with the pyrolyzed carbon (PyrC) that was determined at the EC658nm split? This information can be very useful for previous studies where the PyrC level has been reported.

R: The PyrC at 658 nm contributed 4.4% to dEC. We added the sentence “In order to evaluate the impact of PyrC, we calculated the PyrC at 658 nm fraction of dEC and the average PyrC/dEC was 4.4%, indicating the little influence of PyrC.” in lines 192-194 in the revised manuscript.

What was the distribution of dEC within the EC fractions? This information would be particularly valuable for studies in which OC and EC fractions are used for PMF analyzes in determining sources (e.g., Sahu et al., 2011; Yan et al., 2019; Zhu et al., 2014).

R: We added the dEC/EC in Table 1 in the revised manuscript and added the description in lines 263-267 as “The average dEC mass concentration was  $0.8 \mu\text{g m}^{-3}$  contributing 10.0% to OC, 22.3% to EC and 1.3% to  $\text{PM}_{2.5}$  concentrations with max concentration of  $8.1 \mu\text{g m}^{-3}$  contributing 48.2% to OC, 97.8% to EC and 17.6% to total  $\text{PM}_{2.5}$  concentrations. This information can be further applied in the PMF analysis to evaluate the sources of carbonaceous aerosols (Zhu et al., 2014; Sahu et al., 2011; Yan et al., 2019).”

Many studies compare the relationship between BC and EC (e.g., Jeong et al., 2004; Karanasiou et al., 2020) to determine the relationship between quantities that are determined by different measurement methods. While BC reflects the optical properties of the aerosol, EC rather tends to define the chemical composition. However, the relationship between them undoubtedly exists

(Petzold et al., 2013). An analogous relationship should be between the optically determined BrC and the thermo-optically determined dEC, which is newly defined by the authors of this manuscript. In the introduction to the manuscript, the authors outline relationship between BrC a dEC, but further in the text, they continue with this statement only as not proved hypothesis that dEC is an alternative to BrC. However, this relationship should be demonstrated from parallel BC data measured optically at different wavelengths, e.g., from aethalometer (Sandradewi et al., 2008). If the authors do not have parallel measured data from the aethalometer, then optically measured BC data can be obtained directly from the EC/OC analyzer measurements (Chen et al., 2015; Vodicka et al., 2020; Ziková et al., 2016). The subsequent determination of BrC can then be performed similarly to Chow et al. (2018).

R: We appreciate the reviewer for the very useful suggestions. We were regret that we didn't have the parallel BC data during the study period. However, we do have both the Aethalometer data and Sunset data in winter, 2019. To investigate the relationship between the optically determined BrC and the dEC concentrations, we chose one month data in December, 2019 and added a new 2.3 section in lines 195-215 in the revised manuscript:

### **“2.3 Test of the new dEC data**

To evaluate the new dEC data, parallel BC concentrations were measured with a seven-wavelength Aethalometer with dEC concentrations in December, 2019. Radiation attenuation of an aerosol deposition on a filter ( $ATN_\lambda$ ) is determined by the Beer-Lambert law:

$$ATN_\lambda = \ln \frac{I_{0,\lambda}}{I_\lambda} \quad \text{Equation. (1)}$$

Where  $I_{0,\lambda}$  and  $I_\lambda$  were the measured wavelength-specific laser reflectance signals.  $ATN_\lambda$  is used to calculate the attenuation coefficient with Eq. (2):

$$b_{ATN} = \frac{A}{V} \quad \text{Equation. (2)}$$

Where A was the filter area and V is the sampled air volume. Then a simplified two-component model was used to calculate the contribution of light attenuation to both BC and BrC (Chow et al., 2018; Chen et al., 2015; Sandradewi et al., 2008; Hareley et al., 2008):

$$b_{ATN}(\lambda) = q_{BC} \times \lambda^{-AAE_{BC}} + q_{BrC} \times \lambda^{-AAE_{BrC}} \quad \text{Equation. (3)}$$

Where  $q_{BC}$  and  $q_{BrC}$  were fitting coefficients, AAE was the absorption Ångström exponent which represented the wavelength-dependent characteristics of light absorption capability of aerosols. The AAE of BC was assumed to be 1. Fitting coefficients in Eq. (3) were obtained for potential

$AAE_{BrC}$  between 1 and 8 by least square linear regression and the  $AAE_{BrC}$  led to the overall best fit in terms of  $r^2$  is selected as the effective  $AAE_{BrC}$ . Using these fitting coefficients, the  $b_{ATN}$  due to BC and BrC are calculated at each wavelength. Figure S2 showed that the fitted  $b_{ATN}$  at 405 nm were within  $\pm 5\%$  of the measured values for  $b_{ATN} > 0.01$ . Figure 3 showed the relationship between the  $b_{ATN}$  due to BrC at 405 nm and the dEC. Good correlation between them were found with R square of 0.64, indicating that dEC was associated with BrC.

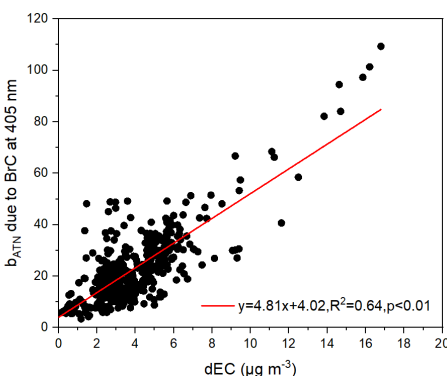

**Figure 3.** Relationship between the  $b_{ATN}$  due to BrC at 405 nm and the dEC concentrations.

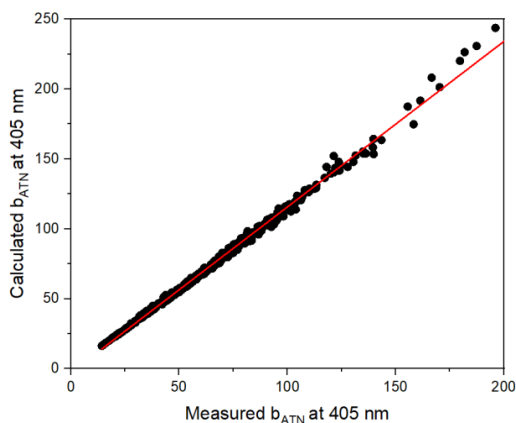

**Figure S2.** Measured  $b_{ATN}$  at 405 nm compared with  $b_{ATN}$  fitted from Eq. (3) using a two-component model.”

Specific comments:

lines 82-85: “This method has been wildly used in present studies applied in the thermal–optical transmittance (TOT) Sunset carbon analyzer based on NIOSH protocol or thermal–optical reflectance (TOR) Desert Research Institute (DRI) carbon analyzer based on IMPROVE\_A protocol (Ji et al., 2016)” First, rather “widely” than “wildly”. Second, the sentence is not

completely correct because it is possible to use both NIOSH and IMPROVE or another temperature protocol on both devices from Sunset or DRI. Third, in a referenced paper by Ji et al. (2016), there is nothing about the IMPROVE\_A protocol. About IMPROVE\_A protocol is a paper by Chow et al. (2007).

R: We agree with the reviewer's suggestions. We changed the sentence to "This method has been widely used in present studies applied in the NIOSH protocol or IMPROVE\_A protocol." And we added the referenced paper by Chow et al. (2007). (see lines 82-83)

line 110: "Wang et al. (2011) used a two-wavelength Aethalometer...." The original work in which this type of BC distinction between wood burning and traffic emission was used is Sandradewi et al. (2008), which should be noted. Further, a reference to the work of Wang et al. (2011) is not in references.

R: We appreciate the reviewer for providing the reference to this work originally reported. We have added a brief introduce of the work reported by Sandradewi et al. (2008) in lines 87-92 as "(Sandradewi et al., 2008) pointed out that light absorption measurements at different wavelength by the aethalometer can be used to quantify the contributions of wood combustion and traffic emissions to aerosols since wood smoke contains organic compounds which enhance the light absorption in ultraviolet wavelength. But traffic emissions produce more BC, which dominates the light absorption in near-infrared wavelength. They took use of aethalometer data measured at 470 nm and 950 nm to quantify the BC distinction between wood burning and traffic emission."

We have added the reference by Wang et al. (2011) in references. (see lines 608-610)

line 102: "Italian Apennines" are quite broad area. Massabó specifically states the Ligurian Apennines, Italy. By the way, reference to the work of Massabó et al. (2016) disappeared from references in second version of manuscript.

R: We have changed the "the Italian Apennines" to "the Ligurian Apennines in Italy" and added the disappeared reference by Massabó et al. (2016). (see lines 106-107 and lines 565-567)

line 116: "important situ data" change to "important in-situ data"

R: Corrected. (see line 120)

line 148: “January-April in 2017” Why the authors report periods that they do not use in the evaluated data?

R: We apology for the wrong date we reported. The right periods were from August, 2015 to July, 2016 and we corrected the right periods in the revised manuscript. (see lines 219-220)

line 153: “. . .collected on prebaked quartz fiber filters. . .” Indicate temperature and time of filter prebaking.

R: Corrected. (see lines 225-226)

line 170: “of ~ 17mm” Filter diameter in Model-4 from Sunset Lab. is usually 16 mm. Is it different in the new type of device with two lasers?

R: We measured the diameter of filter used in our Sunset carbon analyzer and it is 17mm. According to the manual of the semi-continous OCEC carbon aerosol analyzer provided by Sunset Lab, the diameter of the filter is also 17mm. Below is the screenshot from the manual:

5. Using filter punch, cut a new 17mm quartz filter.

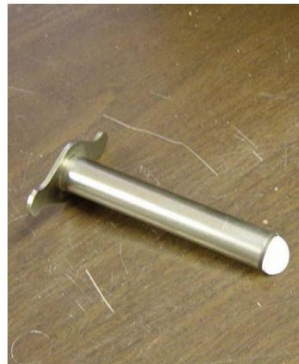

line 172: “modified NIOSH 5040 protocol” If the used NIOSH protocol was modified, the authors should describe it in detail (step, time, temperature) or give a reference where the protocol is described. In addition, the authors should explain why they chose NIOSH protocol which usually underestimate the EC (e.g., Bautista VII et al., 2015; Chow et al., 2001).

R: We thank the reviewer for asking about the protocol used in our instrument. The protocol we used is the default “RT-NIOSH 5040” protocol and we have added this table to the revised supplement as Table S1.

We thank the review for pointing out the disadvantage of NIOSH protocol and we will use

different protocol in the future to provide more information about the results using our new two-wavelength instrument.

Table S1. Temperature protocol of the modified NIOSH 5040 method used in this study.

| <b>Gas</b>                | <b>Temperature(°C)</b> | <b>Time(s)</b> |
|---------------------------|------------------------|----------------|
| <b>He-1</b>               | 310                    | 70             |
| <b>He-2</b>               | 480                    | 60             |
| <b>He-3</b>               | 615                    | 60             |
| <b>He-4</b>               | 840                    | 100            |
| <b>He/O<sub>2</sub>-1</b> | 550                    | 45             |
| <b>He/O<sub>2</sub>-2</b> | 625                    | 45             |
| <b>He/O<sub>2</sub>-3</b> | 700                    | 45             |
| <b>He/O<sub>2</sub>-4</b> | 775                    | 45             |
| <b>He/O<sub>2</sub>-5</b> | 850                    | 120            |
| <b>CH<sub>4</sub>/He</b>  | 0                      | 120            |

line 193: “We also did the measurements of OC and EC in PM 2.5 filter samples using the same method followed by the NIOSH protocol.” Were offline measurements also performed on a two-wavelength analyzer? If yes, please provide a comparison of the dEC. Second, were both data sets corrected (or uncorrected) to blank measurements before comparison?

R: First, we used the OCEC1028 software when doing the offline measurement. It was an old version software used in the traditional one-laser equipped Sunset carbon analyzer. We did the comparison between the online and offline data only to make sure the real-time OC and EC data were comparable, so we didn’t consider the comparison between the dEC. Second, we appreciate the reviewer for the reminding of the blank correction. All the data were corrected to blank measurement before comparison and we added the sentence “All the data were corrected to blank measurement before comparison.” (see lines 188-189)

line 202: “(Draxler and Hess, 1998)” Authors of HYSPLIT prefer newer citations to their model - see: [https://www.ready.noaa.gov/HYSPLIT\\_traj.php](https://www.ready.noaa.gov/HYSPLIT_traj.php)

R: We thank the reviewer for reminding the newer citations of HYSPLIT and we have added the new references (Cohen et al., 2015; Rolph et al., 2017). (see lines 241-242, lines 516-518 and lines



line 233: “The average OC/EC ratios in this study was 3.6, which was lower than most of those reported in other studies...” This ratio depends, among other things, on the protocol used. If you are comparing with other studies, they need to use also the NIOSH protocol. If you compare with studies where they use, for example, the IMPROVE protocol, which generally analyzes higher concentrations of EC than the NIOSH protocol, then the OC/EC ratio between these studies is different.

R: We rechecked these studies reported by the other researchers, most of them used the NIOSH protocol. Still three of them including the work conducted in Hongkong, Italy and Mountain Tai used other protocols. Considering we displayed other similar area to these three sites, for example, Mountain Heng was similar with Mountain Tai which represented background sites and to compare with our study, we removed these studies and added the explain in the title of Table S2 as “Table S2. Comparisons of the concentrations of OC and EC in PM<sub>2.5</sub> between different cities in China and around the world using the TOT method applied in the NIOSH 5040 protocol.”

lines 271-273: “The OC/EC ratio could give some information about primary and secondary organic carbon (Turpin and Huntzicker, 1995; Lim and Turpin, 2002)” The OC/EC ratio can be a rough indicator of the presence of primary and secondary carbon aerosols. Usually, this analysis is based on the determination of the OC/EC<sub>pri</sub> ratio and is applicable under certain conditions (Pio et al., 2011). If the authors want to discuss the share of primary and secondary OCs, they should use some more recent approach— see, e.g., Wu and Yu (2016).

R: We agree with the reviewer that this is a rough discussion and added the sentence “It should be noted that the OC/EC ratios were a rough indicator to estimate the primary and secondary organic carbon, further analysis of the formation of SOC need to be conducted in the future (Pio et al., 2011; Wu and Yu, 2016).” at the end of the paragraph in lines 327-329. Considering this is the first time we report the work about the new two-wavelength method, this paper focused on the measurement and qualitatively discussion on the sources of dEC, so we did not do much work on the quantitatively discussion. We will conduct the work about the primary and secondary OCs in the future.

line 294: "...shown in Fig. 5. We also found similar distributions in dEC/OC and OC/EC." Not clear what authors mean by similar distribution in dEC/OC and OC/EC. In Fig. 5, color maps of these two parameters are different. Moreover, the conclusions that authors draw from it are not very clear from Figure 5. Maybe some other depiction of temperature and RH dependence would be more appropriate.

R: We agree with the reviewer. It is not appropriate to say that dEC/OC and OC/EC have the similar distribution. We removed the sentence "We also found similar distributions in dEC/OC and OC/EC." The high dEC/OC could be found in three area and the first area was similar with the distribution of OC/EC. We changed the sentence to "High dEC/OC (>30 %) could be found in three areas, first showed in the right area with relatively high T at 25-40 °C and RH at 40-60 %, which were usually found in the summer afternoon which was closely related to the strong formation of SOC. This distribution was also shown in OC/EC." (see lines 346-349)

We added two conclusions in the revised manuscript. First was shown in lines 352-353 as "In general, dEC had no strong dependence on the RH and T distribution, indicating the complex formation mechanism of dEC." Second was shown in lines 353-358 as "The OC and EC showed similar distributions with the highest mass loading (OC: > 20  $\mu\text{g m}^{-3}$ ; EC: > 8  $\mu\text{g m}^{-3}$ ) at relatively high RH at 60-80 % which usually occurred at night with relatively low boundary layer height, leading to the accumulation of aerosols. However the corresponding OC/EC ratios were low, suggesting the importance of primary sources to OC and EC in northern Nanjing, which will be verified in the wind rose of OC and EC (Fig. 8)."

line 303: Replace "aass" by "mass".

R: Corrected. (see line 359)

line 323: Replace "Local" by "local".

R: Corrected. (see line 379)

Table 1: Here it makes sense to add average values for the seasons as well. Especially when you mention these seasons in the text, in Figures or in Table S2. And replace "media" by "median".

R: Corrected. We agree with the reviewer and we added the seasonal mean values to Table 1 in

the revised manuscript.

Figure 6. In what kind of software was the visualization of Figure 6 done? If in OpenAir, it should be quoted – see Carslaw and Ropkins (2012).

R: Yes, we have added the reference. (see line 362 and lines 493-494)

Figure 7. In what kind of software was the visualization of Figure 7 done? If in Zefir, it should be quoted - see Petit et al. (2017).

R: Yes, we have added the reference. (see line 374 and lines 572-574)

Table S1: This table provides only sketchy data, which are difficult to compare without context. First, it is necessary to distinguish between cities and countries. It is clear that, for example, Spain is smaller than China, but even so, there are different types of sites with different levels of concentrations (e.g., Querol et al., 2013; Sánchez de la Campa et al., 2009; Viana et al., 2006). The same for Italy. . . Second, similar sites and the same aerosol fraction should be compared (there is a difference in OC/EC ratio for PM<sub>2.5</sub> and PM<sub>10</sub>). Different aerosol PM fractions should be mentioned in the table. There are usually also differences between seasons (typically winter vs. summer) so comparing different periods, for example, annual data with a month of winter data, is also little bit misleading. Third, if other temperature protocols are used in referenced studies, this should also be mentioned, as it also affects the OC/EC ratio. Contrary, if all the cited studies were analyzed by the TOT method, it is not necessary to repeat it in the table and it is enough just to mention it in a table legend.

R: We Thank the reviewer for the suggestions. We distinguished the cities and countries and added the site type description. Since all the references displayed in the table collected PM<sub>2.5</sub> and used the NIOSH 5040 protocol, we changed the title to “Comparisons of the concentrations of OC and EC in PM<sub>2.5</sub> between different cities in China and around the world using the TOT method applied in the NIOSH 5040 protocol.”

We made some change in the description in the revised manuscript since the differences in site type and sampling period as “Compared with carbonaceous aerosols levels in other cities (Table S2), the OC and EC concentrations in Nanjing were generally lower than those observed in urban sites such as Beijing and Shanghai and inland cities like Chengdu and Chongqing which was

affected by the basin terrain characteristics with static wind and unfavorable diffusion conditions, but higher than those observed in the southern coastal cities such as Guangzhou, which was a megacity in China. It could be explained since the site set in Guangzhou was a rural site. In general, the level of carbonaceous aerosols concentrations in China was higher than that in developed countries in the United States and Europe and lower than that in developing countries like India, though the sampling period in India was from late autumn to winter, the much higher concentrations in India indicated the heavy pollution level.” (see lines 268-277)

Figure S1: Indicate on which axis the online and offline data are displayed.

R: Corrected.

#### **Reference:**

Bhattaraia, H., Saikawac, E., Wana, X., Zhue, H., Ram, K., Gao, S., Kang, S., Zhanga, Q., Zhang, Y., Wu, G., Wang, X., Kawamura, K., Fui, P., and Cong, Z.: Levoglucosan as a tracer of biomass burning recent progress and perspectives, *Atmos. Res.*, 220, 20-33, 10.1016/j.atmosres.2019.01.004, 2019.

Birch, M. E. and Cary, R. A.: Elemental carbon-based method for occupational monitoring of particulate diesel exhaust: methodology and exposure issues, *Analyst*, 121, 1183-1190, 1996.

Chen, L. W. A., Chow, J. C., Wang, X. L., Robles, J. A., Sumlin, B. J., Lowenthal, D. H., Zimmermann, R., and Watson, J. G.: Multi-wavelength optical measurement to enhance thermal/optical analysis for carbonaceous aerosol, *Atmos. Meas. Tech.*, 8, 451-461, 10.5194/amt-8-451-2015, 2015.

Chow, J. C., Watson, J. G., Chen, L. W., Chang, M. C., Robinson, N. F., Trimble, D., and Kohl, S.: The IMPROVE\_A temperature protocol for thermal/optical carbon analysis: maintaining consistency with a long-term database, *J. Air. Waste. Manag. Assoc.*, 57, 1014-1023, 10.3155/1047-3289.57.9.1014, 2007.

Chow, J. C., Watson, J. G., Green, M. C., Wang, X., Chen, L. A., Trimble, D. L., Cropper, P. M., Kohl, S. D., and Gronstal, S. B.: Separation of brown carbon from black carbon for IMPROVE and Chemical Speciation Network PM<sub>2.5</sub> samples, *J. Air. Waste. Manag. Assoc.*, 68, 494-510, 10.1080/10962247.2018.1426653, 2018.

Cohen, M. D., Stunder, B. J. B., Rolph, G. D., Draxler, R. R., Stein, A. F., and Ngan, F.: NOAA's HYSPLIT Atmospheric Transport and Dispersion Modeling System, *B. Ame. Meteorol. Soc.*, **96**, 2059-2077, 10.1175/bams-d-14-00110.1, 2015.

Pio, C., Cerqueira, M., Harrison, R. M., Nunes, T., Mirante, F., Alves, C., Oliveira, C., Sanchez de la Campa, A., Artíñano, B., and Matos, M.: OC/EC ratio observations in Europe: Re-thinking the approach for apportionment between primary and secondary organic carbon, *Atmos. Environ.*, **45**, 6121-6132, 10.1016/j.atmosenv.2011.08.045, 2011.

Rolph, G., Stein, A., and Stunder, B.: Real-time Environmental Applications and Display sYstem: READY, *Environ. Model. Softw.*, **95**, 210-228, 10.1016/j.envsoft.2017.06.025, 2017.

Sahu, M., Hu, S., Ryan, P. H., Le Masters, G., Grinshpun, S. A., Chow, J. C., and Biswas, P.: Chemical compositions and source identification of PM<sub>2.5</sub> aerosols for estimation of a diesel source surrogate, *Sci. Total. Environ.*, **409**, 2642-2651, 10.1016/j.scitotenv.2011.03.032, 2011.

Sandradewi, J., Prévôt, A. S. H., Szidat, S., Perron, N., Alfarra, M. R., Lanz, V. A., Weingartner, E., and Baltensperger, U.: Using Aerosol Light Absorption Measurements for the Quantitative Determination of Wood Burning and Traffic Emission Contributions to Particulate Matter, *Environ. Sci. Technol.*, **42**, 3316-3323, 10.1021/es702253m, 2008.

Vodička, P., Schwarz, J., Brus, D., and Ždímal, V.: Online measurements of very low elemental and organic carbon concentrations in aerosols at a subarctic remote station, *Atmos. Environ.*, **226**, 10.1016/j.atmosenv.2020.117380, 2020.

Wang, Y., Hopke, P. K., Rattigan, O. V., Xia, X., Chalupa, D. C., and Utell, M. J.: Characterization of residential wood combustion particles using the two-wavelength aethalometer, *Environ. Sci. Technol.*, **45**, 7387-7393, 10.1021/es2013984, 2011.

Wu, C., and Yu, J. Z.: Determination of primary combustion source organic carbon-to-elemental carbon (OC/EC) ratio using ambient OC and EC measurements: secondary OC-EC correlation minimization method, *Atmos. Chem. Phys.*, **16**, 5453-5465, 10.5194/acp-16-5453-2016, 2016.

Wu, G., Wan, X., Gao, S., Fu, P., Yin, Y., Li, G., Zhang, G., Kang, S., Ram, K., and Cong, Z.: Humic-Like Substances (HULIS) in Aerosols of Central Tibetan Plateau (Nam Co, 4730 m asl): Abundance, Light Absorption Properties, and Sources, *Environ. Sci. Technol.*, **52**, 7203-7211, 10.1021/acs.est.8b01251, 2018.

Wu, G., Ram, K., Fu, P., Wang, W., Zhang, Y., Liu, X., Stone, E. A., Pradhan, B. B., Dangol, P. M., Panday, A. K., Wan, X., Bai, Z., Kang, S., Zhang, Q., and Cong, Z.: Water-Soluble Brown Carbon

in Atmospheric Aerosols from Godavari (Nepal), a Regional Representative of South Asia, *Environ. Sci. Technol.*, 53, 3471-3479, 10.1021/acs.est.9b00596, 2019.

Yan, C., Zheng, M., Shen, G., Cheng, Y., Ma, S., Sun, J., Cui, M., Zhang, F., Han, Y., and Chen, Y.: Characterization of carbon fractions in carbonaceous aerosols from typical fossil fuel combustion sources, *Fuel*, 254, 10.1016/j.fuel.2019.115620, 2019.

Zhu, C. S., Cao, J. J., Tsai, C. J., Shen, Z. X., Han, Y. M., Liu, S. X., and Zhao, Z. Z.: Comparison and implications of PM<sub>2.5</sub> carbon fractions in different environments, *Sci. Total. Environ.*, 466-467, 203-209, 10.1016/j.scitotenv.2013.07.029, 2014.

Zíková, N., Vodička, P., Ludwig, W., Hitztenberger, R., and Schwarz, J.: On the use of the field Sunset semi-continuous analyzer to measure equivalent black carbon concentrations, *Aerosol. Sci. Tech*, 50, 284-296, 10.1080/02786826.2016.1146819, 2016.

# Highly time-resolved characterization of carbonaceous aerosols using a two-wavelength Sunset thermo/optical carbon analyzer

Mengying Bao<sup>1,2,3</sup>, Yan-Lin Zhang<sup>1,2,3\*</sup>, Fang Cao<sup>1,2,3</sup>, Yu-Chi Lin<sup>1,2,3</sup>, Yuhang Wang<sup>4</sup>, Xiaoyan Liu<sup>1,2,3</sup>, Wenqi Zhang<sup>1,2,3</sup>, Meiyi Fan<sup>1,2,3</sup>, Feng Xie<sup>1,2,3</sup>, Robert Cary<sup>5</sup>, Joshua Dixon<sup>5</sup> and Lihua Zhou<sup>6</sup>

*1 Yale-NUIST Center on Atmospheric Environment, Joint International Research Laboratory of Climate and Environment Change (ILCEC), Nanjing University of Information Science and Technology, Nanjing 210044, China*

*2 Key Laboratory of Meteorological Disaster Ministry of Education (KLME), Collaborative Innovation Center on Forecast and Evaluation of Meteorological Disasters (CIC-FEMD), Nanjing University of Information Science and Technology, Nanjing 210044, China*

*3 School of Applied Meteorology, Nanjing University of Information Science and Technology, Nanjing 210044, China*

*4 School of Earth and Atmospheric Sciences, Georgia Institute of Technology, Atlanta 30332, USA*

*5 Sunset Laboratory, 1080 SW Nimbus Avenue, Suite J/5 Tigard, OR 97223, USA*

*6 College of Global Change and Earth System Science, Beijing Normal University, Beijing 100875, China*

*Correspondence: Yan-Lin Zhang (dryanlinzhang@outlook.com)*

## Abstract

Carbonaceous aerosols have great influence on the air quality, human health and climate change. Except for organic carbon (OC) and elemental carbon (EC), brown carbon (BrC), mainly originates from biomass burning, as a group of OC with strong absorption from the visible to near-ultraviolet wavelengths, makes a considerable contribution to global warming. Large amounts of studies have reported long-term observation of OC and EC concentrations throughout the world, but studies of BrC based on long-term observations are rather limited. In this study, we established a two-wavelength method (658 nm and 405 nm) applied in the Sunset thermo/optical carbon analyzer. Based on one-year observation, we firstly investigated the characteristics, meteorological impact and transport process of OC and EC. Due to BrC absorbs light at 405 nm more effectively

than 658 nm, we defined the enhanced concentrations ( $dEC = EC_{405\text{ nm}} - EC_{658\text{ nm}}$ ) and gave the possibility to provide an indicator of BrC. The receptor model and MODIS fire information were used to identify the presence of BrC aerosols. Our results showed that the carbonaceous aerosols concentrations were highest in winter and lowest in summer. Traffic emission was an important source of carbonaceous aerosols in Nanjing. Receptor model results showed that strong local emissions were found in OC and EC aerosols, however dEC aerosols were significantly affected by regional or long-range transport. The dEC/OC and OC/EC ratios showed similar diurnal patterns and the dEC/OC increased when the OC/EC ratios increased, indicating strong secondary sources or biomass burning contributions to dEC. Two biomass burning events both in summer and winter were analyzed and the results showed that the dEC concentrations were obvious higher in biomass burning days, however, no similar levels of the OC and EC concentrations were found both in biomass burning days and normal days in summer, suggesting that biomass burning emission made a great contribution to dEC and the sources of OC and EC were more complicated. Large number of open fire counts from the northwest and southwest areas of the study site were monitored in winter, significantly contributed to OC, EC and dEC. In addition, the near-by YRD area was one of the main potential source areas of dEC, suggesting that anthropogenic emissions could also be important sources of dEC. The results proved that dEC can be an indicator of BrC in biomass burning days. Our modified two-wavelength instrument provided more information than traditional single-wavelength thermo/optical carbon analyzer and gave a new idea about the measurement of BrC, the application of dEC data need to be further investigated.

## 521. Introduction

Carbonaceous aerosols including organic carbon (OC) and elemental carbon (EC), which have significant influence on the global radiative transfer, human health and atmospheric visibility, have been the focus of research in the atmospheric environment field for many years (Lelieveld et al., 2015; Wu and Yu, 2016; Wang et al., 2018; Zhang et al., 2017; Liu et al., 2019; Zhang et al., 2019). EC mainly originates from fossil fuel and biomass combustion and is estimated to be the second largest warming factor behind CO<sub>2</sub> contributing to climate change (Liu et al., 2015; Zhang and Kang, 2019; Cao and Zhang, 2015). OC originates both from primary emissions and gas-to-particle conversion as secondary organic carbon (SOC) and can scatter the solar radiation which causes negative forcing globally (Zhou et al., 2014; Huang et al., 2014).



In the recent decades, brown carbon (BrC), as a kind of light-absorbing organic carbon which can absorb light especially from near-UV to visible wavelength, has caused global concern due to its positive climate effect (Andreae and Gelencsér, 2006; Zhang et al., 2020). BrC is mainly emitted from anthropogenic and biogenic emissions (Zhang et al., 2011). Previous studies have proved that biomass burning and biofuel combustion are the most important sources of primary BrC (Saleh et al., 2014; Wu et al., 2020; Lei et al., 2018). Recent researches reported that in developing countries such as China and India, the contribution of fossil fuel combustion to BrC can't be ignored (Satish et al., 2017; Yan et al., 2017; Kirillova et al., 2014). Secondary BrC is mainly emitted from heterogeneous photo-oxidation reactions or aqueous reactions of anthropogenic and biogenic precursors (Zhang et al., 2020; Li et al., 2020; Zhang et al., 2011). However, due to the lack of understanding of BrC at the molecular level and in situ BrC data, there are still large uncertainties in the estimates of the distribution and the magnitude of BrC climate effect in both remote sensing and modeling method (Arola et al., 2011; Feng et al., 2013).

The thermo-optical analysis (TOA) method is one of the most widely used quantitative method of OC and EC taking use of the difference between the thermo-optical properties of OC and EC (Birch and Cary, 1996; Chow et al., 2004). OC and EC will be volatilized at different heating protocol. The reflectance/transmittance of one laser source (near-infrared wavelength) through the sample filter are continuously monitored and return of the reflectance/transmittance to its initial value on the thermograph was taken as a split point between OC and EC. This way, the formation of pyrolyzed carbon which can also absorb the light and make the sample darker, is corrected. This method has been widely used in present studies applied in the NIOSH protocol or IMPROVE\_A protocol (Ji et al., 2016; Chow et al., 2007). However, the thermo-optical approach assumed that EC is the only light-absorbing species, the presence of BrC, which is part of OC but also a light-absorbing component, shifts this separation towards EC, resulting in overestimated EC values and underestimated OC values (Chen et al., 2015; Birch and Cary, 1996).

Sandradewi et al. (2008) pointed out that light absorption measurements at different wavelength by the aethalometer can be used to quantify the contributions of wood combustion and traffic emissions to aerosols since wood smoke contains organic compounds which enhance the light absorption in ultraviolet wavelength. But traffic emissions produce more BC, which dominates the light absorption in near-infrared wavelength. They took use of aethalometer data measured at 470 nm and 950 nm to quantify the BC distinction between wood burning and traffic emission. With the

similar principle, Wang et al. (2011) used a two-wavelength Aethalometer (370 and 880 nm) to identify the presence of residential wood combustion (RWC) particles which was closely associated with BrC. Organic components of wood smoke particles absorb light at 370 nm more effectively than 880 nm in two-wavelength aethalometer measurements. They believed that the enhanced absorption ( $\Delta C = BC_{370nm} - BC_{880nm}$ ) can serve as an indicator of RWC particles. This method was further used by Wang et al. (2012a) and Wang et al. (2012b). Chen et al. (2015) used a modified seven-wavelength TOT/TOR instrument (Thermal Spectral Analysis – TSA) allowing the determination of the OC-EC split at different wavelengths and light absorption measurements to be made with wavelength-specific loading corrections, providing additional information including the optical properties of black carbon (BC) and BrC from the IR to UV parts of the solar spectrum and their contributions. Massabò et al. (2016) further corrected the OC/EC split point using the Multi-Wavelength Absorbance Analyzer (MWAA) which provides the aerosol absorbance values at five wavelengths from IR to UV together with a Sunset OC/EC analyzer to achieve the BrC concentration. With a set of samples collected wintertime in the Ligurian Apennines in Italy, clear correlations were found between the BrC and levoglucosan mass concentration. A further step of BrC quantification taking use of TSA was reported by Chow et al. (2018), further proving that the use of seven wavelengths in thermal–optical carbon analysis allows contributions from biomass burning and secondary organic aerosols to be estimated. Their results clearly demonstrated the role of BrC in the thermo-optical analysis. However, these techniques focus on the light absorption measurement of BrC and are still limited reported in previous researches, though they provide quartz-fiber filter samples that are currently being characterized for organic carbon (OC) and EC by thermal/optical analysis. These methods mentioned above still can't achieve the observation of long-term real-time BrC mass concentrations.

Since the establishment of the thermal–optical transmittance (TOT) method by the Sunset Laboratory, the Sunset OC/EC instrument, as part of the Chemical Speciation Network (CSN), where cover over 100 monitors across the United States over 15 years, offering long-term measurement of OC and EC concentrations, has been widely used in the United States and throughout the world providing important in-situ data of OC and EC aerosols (U.S.EPA, 2019; Birch and Cary, 1996). This instrument had been designed with a tuned diode laser (red 660 nm) to correct the formation of pyrolyzed carbon. In this study, we modified the Sunset instrument to a two-wavelength (658 nm and 405 nm) Sunset carbon analyzer by adding one more violet diode

laser at  $\lambda=405$  nm. The violet diode laser together with the red diode laser, focus through the sample chamber then the laser beam passed through the filter to correct for the pyrolysis-induced error. Previous work reported by Chen et al. (2015) as mentioned above was integrating the optical instrument like the aethalometer to the traditional OC/EC analyzer, in this way, they provided the light absorption contributions of BC and BrC. The enhanced carbon analyzer provided new insight into more accurate OC and EC measurements. Their work was conducted in offline mode, based on their work, our instrument can get the real-time OC and EC mass concentrations both at 658 nm and 405 nm. BrC particles absorb light at 405 nm more effectively than 658 nm in the two-wavelength Sunset carbon measurements. We define  $dEC=EC_{405\text{ nm}}-EC_{658\text{ nm}}$  and hope it can be an indicator of BrC aerosols so that we can divide real-time BrC mass concentration measurement from the two-wavelength measurement.

Nanjing, as one of the largest cities in the Yangzi River Delta region, represents a heavy industry area with a dense population. In addition, due to its topography, Nanjing is very sensitive to regional transport of air masses from its surrounding areas. OC, EC and dEC aerosols were observed from June 2015 to July 2016 at Nanjing University of Information Science and Technology (NUIST). Based on the abundant data, together with MODIS fire information, we can analyze the temporal variation, transport processes and sources of carbonaceous aerosols in North Nanjing and evaluate the biomass burning impact on dEC aerosols, which can be the scientific basis of pollution control policy.

## **Methods**

### **2.1 Study site**

In this study, the sampling site is located at Nanjing University of Information Science and Technology (NUIST) in the North Suburb of Nanjing (32°20'N, 118°71'E). The study site is surrounded by housing and industrial areas. Many chemical enterprises, for example, Yangzi Petrochemical, Nanjing Chemical Industry and Nanjing Iron and Steel Group are located at the northeast of the study region, which produces exhaust with large amounts of aerosol particles. The study site is adjacent to a heavily trafficked road (Ningliu Road) located near the site, approximately 600 m to the east. Therefore, this region has intense human activities, industrial emissions and heavy traffic flow.

### **2.2 Two-wavelength TOT measurement**

Hourly concentrations of OC and EC in  $PM_{2.5}$  were sampled and measured by a semi-

continuous carbon analyzer (Model-4, Sunset Lab, USA). Air samples were collected continuously with a sample flow of  $\sim 8$  L/min through a PM<sub>2.5</sub> cyclone. The collection time was set at 45 min for each cycle. The airstream passed through a parallel plate organic denuder to reduce the effect of volatile organic compounds and finally deposited on a quartz filter with a diameter of  $\sim 17$  mm.

After a sample was collected, OC and EC were analyzed using the thermal-optical transmittance (TOT) method and applied a slightly modified NIOSH 5040 protocol. The details of the heating setup were shown in Table S1. Figure 1 shows the structure and operational principle of the instrument. Briefly, it consists of two-stages: the oven was first purged with helium and the oven temperature increased in a stepped ramp to 840°C, OC was volatilized in this stage. Then the oven temperature kept at 840°C for a while and went down to 550°C. In the second stage, EC was volatilized in a second temperature ramp to 850°C while purging the oven with a mixture containing 2% oxygen and 98% helium. The pyrolysis products were converted to carbon dioxide (CO<sub>2</sub>) which was quantified using a self-contained nondispersive infrared (NDIR) system.

Also, in this study, we used two-diode lasers (658 nm and 405 nm) equipped Sunset analyzer, thus mass concentrations of OC and EC at different wavelengths can be measured with the 2-lasers system. The split point between OC and EC was detected automatically by the RTCalc731 software provided by Sunset Lab. The principle was same as the traditional Sunset carbon analyzer (Birch and Cary, 1996). An example thermogram of sample analysis using the two-wavelength Sunset semi-continuous carbon analyzer was shown in Fig. 2. During the sample analysis, the laser beam at 658 nm and 405 nm were both sent through the filter and the transmitted light signal were monitored to correct the undesired formation of pyrolyzed carbon (PyrC) and then to determine the split point of OC and EC at both two wavelengths. BrC aerosols absorb light at 405 nm more significantly than 658 nm in the 2-lasers system. Due to the strong absorption of BrC in near-ultraviolet wavelength, thus this enhanced absorption at 405 nm can serve as an indicator of BrC aerosols (Liu et al., 2015). We define dEC data as the difference of EC concentrations at two wavelengths ( $dEC = EC_{405nm} - EC_{658nm}$ ) to identify the presence of BrC aerosols. Our study provided a one-year measurement of dEC mass concentrations. Besides, OC and EC represent the OC and EC concentrations at 658 nm in this paper without a special explanation.

At the end of each analysis, a fixed volume of an internal standard containing 5% methane and 95% Helium was injected and thus a known carbon mass could be derived. The external sucrose standard ( $4.207 \mu\text{g } \mu\text{L}^{-1}$ ) calibration was conducted every week to insure repeatable quantification.

Calibration with an instrument blank was conducted every day. Both detection limit for OC and EC of the instrument was  $0.5 \mu\text{g m}^{-3}$ . We also did the measurements of OC and EC in PM<sub>2.5</sub> filter samples using the same method followed by the NIOSH protocol. All the data were corrected to blank measurement before comparison. Figure S1 shows the correlations between the real-time OC, EC concentrations and sampling OC, EC concentrations at the same time. The results showed that the online and offline data during the corresponding periods had good correlations with R<sup>2</sup> of 0.8 for OC, R<sup>2</sup> of 0.4 for EC and R<sup>2</sup> of 0.8 for TC. In order to evaluate the impact of PyrC, we calculated the PyrC at 658 nm fraction of dEC and the average PyrC/dEC was 4.4%, indicating the little influence of PyrC.

### 2.3 Test of the new dEC data

To evaluate the new dEC data, parallel BC concentrations were measured with a seven-wavelength Aethalometer with dEC concentrations in December, 2019. Radiation attenuation of an aerosol deposition on a filter ( $ATN_{\lambda}$ ) is determined by the Beer-Lambert law:

$$ATN_{\lambda} = \ln \frac{I_{0,\lambda}}{I_{\lambda}} \quad \text{Equation. (1)}$$

Where  $I_{0,\lambda}$  and  $I_{\lambda}$  were the measured wavelength-specific laser reflectance signals.  $ATN_{\lambda}$  is used to calculate the attenuation coefficient with Eq. (2):

$$b_{ATN} = \frac{A}{V} \quad \text{Equation. (2)}$$

Where A was the filter area and V is the sampled air volume. Then a simplified two-component model was used to calculate the contribution of light attenuation to both BC and BrC (Chow et al., 2018; Chen et al., 2015; Sandradewi et al., 2008; Hareley et al., 2008):

$$b_{ATN}(\lambda) = q_{BC} \times \lambda^{-AAE_{BC}} + q_{BrC} \times \lambda^{-AAE_{BrC}} \quad \text{Equation. (3)}$$

Where  $q_{BC}$  and  $q_{BrC}$  were fitting coefficients, AAE was the absorption Ångström exponent which represented the wavelength-dependent characteristics of light absorption capability of aerosols. The AAE of BC was assumed to be 1. Fitting coefficients in Eq. (3) were obtained for potential  $AAE_{BrC}$  between 1 and 8 by least square linear regression and the  $AAE_{BrC}$  led to the overall best fit in terms of  $r^2$  is selected as the effective  $AAE_{BrC}$ . Using these fitting coefficients, the  $b_{ATN}$  due to BC and BrC are calculated at each wavelength. Figure S2 showed that the fitted  $b_{ATN}$  at 405 nm were within  $\pm 5\%$  of the measured values for  $b_{ATN} > 0.01$ . Figure 3 showed the relationship between the  $b_{ATN}$  due to BrC at 405 nm and the dEC. Good correlation between them were found with R square of 0.64, indicating that dEC was associated with BrC.

## 2.4 Sampling

### 2.4.1 Real-time PM<sub>2.5</sub> observation

The real-time PM<sub>2.5</sub> concentrations were measured through the Tapered Element Oscillating Microbalance (TEOM) method (TEOM1405-DF, Thermo Scientific, America) from August, 2015 to July, 2016. The resolution of the measured data was 6 min. The instrumental operation maintenance, data assurance and quality control were performed according to the Chinese Ministry of Environmental Protection Standards for PM<sub>10</sub> and PM<sub>2.5</sub> which was named “HJ 653-2013” (Zhang and Cao, 2015b).

### 2.4.2 Sample collections

PM<sub>2.5</sub> in the atmosphere were collected on prebaked quartz fiber filters which were under 450°C for 6 hours (QFF, PALL, America) with 8\*10 inch by a high volume air sampler (KC-1000, Qingdao, China) at a flow rate of 999 L min<sup>-1</sup> in four months: 4 June to 18 June, 6 October to 2 November and 10 December to 31 December in 2015, 10 May to 31 May in 2016. Sampling started and ended at around 8:00 and 20:00 every day; each sample was collected for 12 hours. A total of 148 samples were collected including four field blank filters in four seasons collected following 10 mins exposures to ambient air without active sampling.

All QFFs were pre-baked at 450 °C for 6 h before sampling to remove residual carbon. Before and after sampling, all QFFs were weighed by electronic balance (Sartorius, 0.1 mg, Germany). After weighting, the filters were wrapped in aluminum foils, packed in air-tight polyethylene bags and stored at -20°C for further analysis. All procedures during handling of filters were strictly quality controlled to avoid any possible contamination.

## 2.5 Identification of potential regional sources

The Hybrid Single-Particle Lagrangian Integrated Trajectory (HYSLPIT4.8) model, provided by the National Oceanic and Atmospheric Administration (NOAA) were used to investigate the air mass origins of carbonaceous aerosols. The 48-hour back trajectories at Nanjing (32.2°N, 118.7°E) were calculated every hour (Draxler and Hess, 1998; Rolph et al., 2017; Cohen et al., 2015). In order to evaluate the behavior of the air masses circulation in the planetary boundary layer (PBL), the trajectories at 500m corresponding to the upper-middle height of the PBL were calculated, representing well-mixed convective boundary layer for regional transport investigation (Xu and Akhtar, 2010). The National Center for Environmental Prediction Global Data Assimilation System (NCEP GDAS) data obtained from NOAA with a spatial resolution of 1° × 1°

and 24 levels of the vertical resolution were used as meteorological data input to the model. The Potential Source Contribution Function (PSCF) model was usually applied to localize the potential sources of pollutants. The details about the setup of the model can be seen in the research reported by Bao et al. (2017).

### 3. Results and discussion

#### 3.1 Characteristics of carbonaceous aerosols

##### 3.1.1 Concentrations of carbonaceous aerosols

The statistics for the  $PM_{2.5}$ , OC, EC and dEC mass concentrations at the NUIST site are summarized in Table 1. The hourly OC concentrations ranged from 0.5 to  $45.8 \mu g m^{-3}$  (average of  $8.9 \pm 5.5 \mu g m^{-3}$ ), and the EC concentrations ranged from 0.0 to  $17.6 \mu g m^{-3}$  (average of  $3.1 \pm 2.0 \mu g m^{-3}$ ). The results were comparable to those reported by Chen et al. (2017) in the Xianlin Campus of Nanjing University ( $5.7 \mu g m^{-3}$  for OC and  $3.2 \mu g m^{-3}$  for EC), which site was located in the southeast suburb of Nanjing and close to the G25 highway and were also affected by traffic sources. The higher OC concentrations in this study were probably due to the around chemical enterprise emissions. The average contributions of OC and EC to the total measured  $PM_{2.5}$  mass was 12.8% and 4.3%, respectively, suggesting that carbonaceous fraction made an important contribution to fine particulate matter. The average dEC mass concentration was  $0.8 \mu g m^{-3}$  contributing 10.0% to OC, 22.3% to EC and 1.3% to  $PM_{2.5}$  concentrations with max concentration of  $8.1 \mu g m^{-3}$  contributing 48.2% to OC, 97.8% to EC and 17.6% to total  $PM_{2.5}$  concentrations. This information can be further applied in the PMF analysis to evaluate the sources of carbonaceous aerosols (Zhu et al., 2014; Sahu et al., 2011; Yan et al., 2019).

Compared with carbonaceous aerosols levels in other cities (Table S2), the OC and EC concentrations in Nanjing were generally lower than those observed in urban sites such as Beijing and Shanghai and inland cities like Chengdu and Chongqing which was affected by the basin terrain characteristics with static wind and unfavorable diffusion conditions, but higher than those observed in the southern coastal cities such as Guangzhou, which was a megacity in China. It could be explained since the site set in Guangzhou was a rural site. In general, the level of carbonaceous aerosols concentrations in China was higher than that in developed countries in the United States and Europe and lower than that in developing countries like India, though the sampling period in India was from late autumn to winter, the much higher concentrations in India indicated the heavy pollution level. The average OC/EC ratios in this study was 3.6, which was lower than most of



those reported in other studies, indicating the important impact of vehicle emissions in our study site.

Figure 4 shows the mass fractions of hourly carbonaceous aerosols and OC/EC ratios at different  $PM_{2.5}$  concentration intervals during the study periods. During the study period, 84.2% of the  $PM_{2.5}$  samples exceeded the daily averaged Chinese national ambient air quality standard (NAAQS) of  $35.0 \mu g m^{-3}$  for the first grade and 40.1% of the total samples exceeded the NAAQS of  $75.0 \mu g m^{-3}$  for the second grade, reflecting heavy aerosol pollution in the study area. Generally, the fractions of carbonaceous components decreased with increasing  $PM_{2.5}$  pollution level. Larger mass fraction (about 32.3%) of carbonaceous aerosols in  $PM_{2.5}$  was found for period relatively lower  $PM_{2.5}$  levels ( $0-20 \mu g m^{-3}$ ) compared to high  $PM_{2.5}$  levels ( $300-500 \mu g m^{-3}$ ) with carbonaceous aerosols mass fraction of 5.2%. The result indicated other components like secondary inorganic aerosol (SIA) contributes more significantly to heavy haze events in Nanjing, which was also found in other cities in the Yangtze River Delta area (Yang et al., 2011; Zhang and Zhang, 2019). The contribution of dEC to OC decreased with the increase of  $PM_{2.5}$  concentrations between  $0-200 \mu g m^{-3}$ , and then increased with the increase of  $PM_{2.5}$  concentrations between  $200-500 \mu g m^{-3}$ . The dEC contributed most significantly to OC of 14.3% when  $PM_{2.5}$  concentrations below  $20 \mu g m^{-3}$ . Similar trend was found in OC/EC ratios which showed a sharp increase along with enhanced  $PM_{2.5}$  level above  $150 \mu g m^{-3}$ . Previous studies had reported that high OC/EC ratios were related to SOC formation or biomass burning emissions whereas low OC/EC ratios were related to vehicle exhaust (Wang et al., 2015). We divided the dEC/OC at different intervals of OC/EC ratios and found that the dEC/OC increased when the OC/EC ratios increased in four seasons, indicating strong secondary sources or biomass burning contributions to dEC during heavy pollution periods (Fig. S3).

### 3.1.2 Seasonal variations of carbonaceous aerosols

As shown in Fig. 5, the OC, EC, dEC concentrations and dEC/OC ratios showed similar variations with highest in winter and lowest in summer. The average OC and EC concentration in winter was ~1.4 times and 1.5 times higher than that in summer and the average dEC concentrations and dEC/OC in winter were approximately 1.4 and 1.6 times higher than those in summer (Table 1). High dEC/OC was found in January and February in winter, indicating strong influence of anthropogenic sources on dEC, such as coal combustion. In addition, we found strong biomass burning activities in February, which significantly contributed to the high concentrations



of dEC in February, more details could be found in section 3.3. The seasonality of carbonaceous species in PM<sub>2.5</sub> was strongly influenced by seasonal variations in emissions intensities and meteorological parameters. Table S3 summarizes the meteorological parameters in four seasons during the study period. The high carbonaceous aerosols concentrations in winter were mainly a result of relatively stable atmospheric conditions with low temperature, relative humidity and boundary layer on one hand, and on the other hand, increasing emissions from fossil-fuel combustion for heating from the chemical enterprises nearby. In summer, higher boundary layer resulted in the dispersion of aerosols in the atmosphere, and higher temperature promoted the partitioning of semi-volatile organic compounds (SVOCs) into gaseous phase (Yang et al., 2011). In addition, large precipitation in summer (586 mm in total) favored the wet scavenging processes of aerosols.

The OC/EC ratios in spring, summer, autumn and winter were 3.9, 4.0, 2.8 and 3.4, respectively (Table 1). The OC/EC ratio could give some information about primary and secondary organic carbon (Turpin and Huntzicker, 1995; Lim and Turpin, 2002). In summer, strong convective activities in the atmospheric boundary layer and solar radiation, high temperature and plenty of moisture in the atmosphere were favorable for the formation of SOC. On the other hand, the high OC/EC ratios in June in this study were also strongly related to biomass burning which will be discussed in the 3.3 sections. The lower ratios of OC to EC in autumn and winter indicated that strong primary sources in these two seasons. It should be noted that the OC/EC ratios were a rough indicator to estimate the primary and secondary organic carbon, further analysis of the formation of SOC need to be conducted in the future (Pio et al., 2011; Wu and Yu, 2016).

### 3.1.3 Diurnal variation of carbonaceous aerosols

The diurnal pattern of carbonaceous aerosols can be affected by both meteorological parameters and sources (Ji et al., 2016). Figure 6 depicts the diurnal variation of OC, EC, dEC, dEC/OC and OC/EC ratios during the study period. Clear diurnal variations were observed in OC and EC aerosols. Both the OC and EC concentrations kept high levels at night and low levels in the daytime, indicating the strong influence of the atmospheric boundary layer on air quality in the northern Nanjing. The peak occurred in the morning both in OC and EC indicating the significant impact of traffic source on the OC and EC concentrations. The dEC/OC and OC/EC ratios showed similar trends in the daytime with gradually increase from morning till afternoon, indicating the importance of the contribution of secondary sources to dEC. Similar though not so obvious diurnal

variations were found in dEC. It should be noted that the vehicle emissions and the boundary layer height had no significant effect on the diurnal variation of dEC/OC, suggesting there was no significant local sources of dEC. There was a small peak in dEC/OC at 3:00 am, which might be related to the aqueous secondary organic aerosols formations during nighttime (Sullivan et al., 2016).

The relative humidity (RH) and Temperature (T) dependent distributions of OC, EC mass concentrations and dEC/OC and OC/EC throughout the study period are shown in Fig. 7. High dEC/OC (>30 %) could be found in three areas, first showed in the right area with relatively high T at 25-40 °C and RH at 40-60 %, which were usually found in the summer afternoon which was closely related to the strong formation of SOC. This distribution was also shown in OC/EC. The second area was displayed in the upper region with RH over 80 % and T at 10-20 °C and the third area appeared when RH below 30 % and T at about 10 °C, corresponding to nighttime and winter afternoon. In general, dEC had no strong dependence on the RH and T distribution, indicating the complex formation mechanism of dEC. The OC and EC showed similar distributions with the highest mass loading (OC: > 20  $\mu\text{g m}^{-3}$ ; EC: > 8  $\mu\text{g m}^{-3}$ ) at relatively high RH at 60-80 % which usually occurred at night with relatively low boundary layer height, leading to the accumulation of aerosols. However the corresponding OC/EC ratios were low, suggesting the importance of primary sources to OC and EC in northern Nanjing, which will be verified in the wind rose of OC and EC (Fig. 8).

### 3.2 Air mass transport

#### 3.2.1 Windrose of carbonaceous aerosols

To investigate the influences of air masses transport to the study site, the wind rose of OC, EC and dEC/OC using hourly data in four seasons is illustrated in Fig. 8 (Carslaw and Ropkins, 2012). Two points should be noted. First, high OC and EC mass concentrations were found near the field site (indicating by  $WS < 1 \text{ m s}^{-1}$ ), suggesting that local and primary emissions (e.g., industrial and vehicle emissions) were stable and important sources contributing to atmospheric OC and EC mass concentrations in northern Nanjing. The OC mass concentrations from the southwest increased with the increase of WS in summer, indicating that sources of OC are complicated in summer including secondary reaction during long-range or regional transport. Second, compared with OC and EC, dEC aerosols showed no significant local sources. The dEC/OC increased with the increasing of WS and highest dEC/OC were found when WS over  $3 \text{ m s}^{-1}$ . Long-range or regional

transport was highly likely the main sources contributing to dEC mass concentrations.

### 3.2.2 The potential source areas of carbonaceous aerosols

The possible source contributions were evaluated using the PSCF model and the PSCF map are shown in Fig. 9 (Petit et al., 2017). The areas with high PSCF values were highly likely the potential pollution source areas. As shown in Fig. 9, PSCF results further proved the strong regional transport contribution to dEC aerosols and local contributions to OC and EC aerosols. In spring, the potential source areas of OC and EC were mainly from the southwest of Nanjing, however, the potential source areas of dEC aerosols were from the east of Nanjing, indicating obvious different sources between OC, EC and dEC. In summer, local areas were the main sources areas of EC and the near-by Yangtze River Delta City Group from southeast of Nanjing including developed cities like Shanghai were the main sources areas of OC and dEC. The anthropogenic emissions from these areas might be important sources of OC and dEC. Besides, both the potential sources areas of dEC and EC were displayed in the northwest of Nanjing in summer, suggesting strong primary sources of dEC from this area which were very likely associated to biomass burning, more details were in the section 3.3. In autumn, strongest local sources from the study site of OC and EC were found. However the dEC mainly originated from regional transport from the northwest and southeast areas of Nanjing. Biomass burning has been proved to be an important source of air pollutants in the Yangtze River Delta (YRD) area, especially in the wheat harvest seasons (e.g., June and October) (Cheng et al., 2014; Zhang and Cao, 2015a). In addition, the YRD area is the most economically developed region in China and has lots of industrial cities, which means that industrial emissions and anthropogenic sources contributed to high carbonaceous aerosols pollution levels. In winter, dEC were mainly from long-range transport from northern cities and regional transport from the southwest areas of Nanjing while both long-range transport and local sources were found in OC and EC concentrations.

### 3.3 The characteristics of carbonaceous aerosols during biomass burning periods

The biomass burning emission has been proved to be an important source of BrC on a global scale, it is consistently observed in large-scale forest fire events (Laskin et al., 2015). Based on the Fire Information for Resource Management System (FIRMS) derived from the Moderate Resolution Imaging Spectroradiometer (MODIS), we found that the fire points reached to 2028, 1773 and 967 on 11 Jun 2015, 7 February 2016 and 2 Mar 2016 in the areas around our study site, respectively, suggesting there were strong biomass burning events on these days (Fig. S4). To

further investigate the biomass burning impact on dEC aerosols, we analyzed the temporal trends of carbonaceous aerosols from 4 June 2015 to 19 June 2015 and 7 February 2016 to 3 Mar 2016, respectively. Combining the observed aerosols concentrations and fire information, we divided the periods into normal days and biomass burning days. It should be noted that the biomass burning days are not determined based only on fire points. We also considered the 48-h backward trajectories and open biomass burning areas. For example, we did find lots of fire points from 11 June 2015 to 12 June 2015 and from 7 February 2016 to 10 February 2016, respectively, and the 48-h backward trajectories went through these biomass burning areas (Fig. S5b, c). However, although there were large amounts of fire points in northwest of Nanjing from 8 June 2015 to 9 June 2015, the backward trajectory showed air mass during the periods came from the southeast areas where no open fire points were found (Fig. S5a). In contrast, there were only a few fire points found near the study site from 26 February 2016 to 27 February 2016, the 48-h backward trajectory showed the air mass was exactly from the area (Fig. S5d).

As shown in Fig. 10 and Fig. 11, we found that dEC concentrations, dEC/OC and OC/EC ratios showed peaks during each biomass burning periods which was not that obvious in OC and EC concentrations, suggesting the unique biomass burning impact on dEC and the sources of OC and EC were more complicated. It should be noted that there were peaks of dEC appeared on 9 June 2015 and 13 February 2016, which were not biomass burning days, suggesting that biomass burning was not the only sources of dEC. As mentioned in the 3.1 and 3.2 section, anthropogenic emissions could be the sources of dEC and the secondary sources couldn't be ignored, too. Summarized in Table 2 are the average and standard deviation values of OC, EC, OC/EC, dEC and dEC/OC during biomass burning and normal days. The OC/EC, dEC concentrations and dEC/OC were obvious higher in biomass burning days than those in normal days, but similar levels of the OC and EC concentrations were found both in biomass burning days and normal days in summer, suggesting the great contribution of biomass burning emissions to dEC aerosols and there were other sources of OC and EC in summer. All the carbonaceous aerosols were higher in biomass burning days in winter, in addition, the location of open fire counts were mainly in the northwest and southwest area of the study site (Fig. S5c, d), which were the potential source areas of OC, EC and dEC in winter as discussed in the section 3.2.2, indicating strong contributions of biomass burning emissions to all the carbonaceous aerosols in winter.

#### **4. Conclusion**

In this study, the characteristics and sources of carbonaceous aerosols in North Nanjing were investigated and we introduced a two-wavelength method by modifying the Sunset carbon analyzer. We incorporated a new diode laser at  $\lambda=405$  nm in the instrument, making it possible to detect the laser beam passing through the filter at both wavelength at  $\lambda=658$  nm and  $\lambda=405$  nm, so we can obtain the dEC concentrations. Our study illustrated the feasibility of using dEC to characterize the BrC aerosols, providing a new idea about the measurement of BrC. The results showed that high (low) OC, EC and dEC concentrations were found in Winter (summer), indicating the significant impact of the increase of various emission sources in winter and wet scavenging of rain in summer. Similar diurnal cycles for OC and EC concentrations were found with high at night and low in daytime, strongly affected by the boundary layers. Traffic emissions were found to have significant influence on the concentrations of OC and EC. Similar trends were found in the diurnal cycle of dEC/OC and OC/EC and the dEC/OC increased when the OC/EC ratios increased, indicating strong secondary sources or biomass burning impact on dEC. The wind rose and receptor model results showed that strong local emissions were found in OC and EC aerosols, however dEC aerosols were significantly affected by regional or long-range transport. The nearby YRD area was one of the main potential source areas of dEC, suggesting that anthropogenic emissions could be the sources of dEC. Together with the back trajectories analysis and MODIS fire informations, we analyzed two biomass burning events both in summer and winter. The results showed that the sources of OC and EC were more complicated than those of dEC aerosols in summer. Biomass burning emission made a great contribution to dEC concentrations in summer. Large number of open fire counts from the northwest and southwest areas of the study site were monitored, significantly contributed to all the carbonaceous aerosols pollutions in winter.

Our modified two-wavelength instrument provided more information than traditional single-wavelength thermo/optical carbon analyzer. The results proved that dEC can be an indicator of BrC in biomass burning days. It should be noted that the sources of dEC were complicated and the anthropogenic emissions and secondary formations of dEC aerosols couldn't be ignored, further chemical analysis need to be conducted in the future. The evaluation of SOC formation and the relationship between dEC and SOC can be conducted. In addition, More chemical analysis such as the analysis of the ion, the organic matter or the sugars in  $PM_{2.5}$  can be measured, thus we can get some information of the tracers of different sources and more accurate and quantitative source apportionment can be done (Bhattaraia et al., 2019; Wu et al., 2018; Wu et al., 2019). We also hope

that the dEC data can be further applied in more researches.

## Acknowledgments

This research is financially supported by the National Natural Science Foundation of China (grant no. 41977305), the Provincial Natural Science Foundation of Jiangsu (grant no. BK20180040) and the Postgraduate Research & Practice Innovation Program of Jiangsu Province (grant no. KYCX18\_1014). This study is supported by the funding of Jiangsu Innovation & Entrepreneurship Team. The authors would also like to thank the China Scholarship Council for the support to Mengying Bao. We would also like to express our gratitude to Yuanyuan Zhang, Zufe Xu and Tianran Zhang for their assistance in the instrument maintenance throughout the observation period. Besides, we are grateful for Prof. Yunhua Chang, who makes considerable comments and suggestions to this paper.

## References:

- Andreae, M. O. and Gelencsér, A.: Black carbon or brown carbon? The nature of light-absorbing carbonaceous aerosols, *Atmos. Chem. Phys.*, 6, 3131–3148, 2006.
- Arola, A., Schuster, G., Myhre, G., Kazadzis, S., Dey, S., and Tripathi, S. N.: Inferring absorbing organic carbon content from AERONET data, *Atmos. Chem. Phys.*, 11, 215–225, 10.5194/acp-11-215-2011, 2011.
- Bao, M., Cao, F., Chang, Y., Zhang, Y.-L., Gao, Y., Liu, X., Zhang, Y., Zhang, W., Tang, T., Xu, Z., Liu, S., Lee, X., Li, J., and Zhang, G.: Characteristics and origins of air pollutants and carbonaceous aerosols during wintertime haze episodes at a rural site in the Yangtze River Delta, China, *Atmos. Pollut. Res.*, 8, 900–911, 10.1016/j.apr.2017.03.001, 2017.
- Bhattarai, H., Saikawa, E., Wani, X., Hue, H., Ram, K., Gao, S., Kang, S., Zhang, Q., Zhang, Y., Wu, G., Wang, X., Kawamura, K., Fui, P., and Cong, Z.: Levoglucosan as a tracer of biomass burning recent progress and perspectives, *Atmos. Res.*, 220, 20–33, 10.1016/j.atmosres.2019.01.004, 2019.
- Birch, M. E. and Cary, R. A.: Elemental carbon-based method for occupational monitoring of particulate diesel exhaust: methodology and exposure issues, *Analyst*, 121, 1183–1190, 1996.
- Carlaw, D. C., and Ropkins, K.: openair — An R package for air quality data analysis, *Environ. Model. Softw.*, 27–28, 52–61, 10.1016/j.envsoft.2011.09.008, 2012.

Cao, F. and Zhang, Y.-L.: Principle, method development and application of radiocarbon ( $^{14}\text{C}$ )  
—based source apportionment of carbonaceous aerosols: a review, *Adv. Earth Sci.*, 30, 425-432,  
10.11867/j. issn. 1001-8166. 2015. 04. 0425., 2015.

Chen, L. W. A., Chow, J. C., Wang, X. L., Robles, J. A., Sumlin, B. J., Lowenthal, D. H.,  
Zimmermann, R., and Watson, J. G.: Multi-wavelength optical measurement to enhance  
thermal/optical analysis for carbonaceous aerosol, *Atmos. Meas. Tech.*, 8, 451-461, 10.5194/amt-  
8-451-2015, 2015.

Cheng, Z., Wang, S., Fu, X., Watson, J. G., Jiang, J., Fu, Q., Chen, C., Xu, B., Yu, J., Chow, J. C.,  
and Hao, J.: Impact of biomass burning on haze pollution in the Yangtze River delta, China: a case  
study in summer 2011, *Atmos. Chem. Phys.*, 14, 4573-4585, 10.5194/acp-14-4573-2014, 2014.

Chow, J. C., Watson, J. G., Chen, L.-W. A., Arnott, W. P., Moosmüller, H., and Fung, K.:  
Equivalence of elemental carbon by thermal/optical reflectance and transmittance with different  
temperature protocols, *Environ. Sci. Technol.*, 38, 4414-4422, 10.1021/es034936u 2004.

Chow, J. C., Watson, J. G., Chen, L. W., Chang, M. C., Robinson, N. F., Trimble, D., and Kohl, S.:  
The IMPROVE\_A temperature protocol for thermal/optical carbon analysis: maintaining  
consistency with a long-term database, *J. Air. Waste. Manag. Assoc.*, 57, 1014-1023,  
10.3155/1047-3289.57.9.1014, 2007.

Chow, J. C., Watson, J. G., Green, M. C., Wang, X., Chen, L. A., Trimble, D. L., Cropper, P. M.,  
Kohl, S. D., and Gronstal, S. B.: Separation of brown carbon from black carbon for IMPROVE  
and Chemical Speciation Network  $\text{PM}_{2.5}$  samples, *J. Air Waste Manag. Assoc.*, 68, 494-510,  
10.1080/10962247, 2018

Cohen, M. D., Stunder, B. J. B., Rolph, G. D., Draxler, R. R., Stein, A. F., and Ngan, F.: NOAA's  
HYSPLIT Atmospheric Transport and Dispersion Modeling System, *B. Am. Meteorol. Soc.*, 96,  
2059-2077, 10.1175/bams-d-14-00110.1, 2015.

Draxler, R. R., and Hess, G. D.: An overview of the HYSPLIT\_4 modelling system for trajectories,  
dispersion, and deposition, *Aust. Meteorol. Mag.*, 47, 295-308, 1998.

Feng, Y., Ramanathan, V., and Kotamarthi, V. R.: Brown carbon: a significant atmospheric  
absorber of solar radiation?, *Atmos. Chem. Phys.*, 13, 8607-8621, 10.5194/acp-13-8607-2013,  
2013.

Hareley, O. L., Corrigan, C. E., and Kirchstetter, T. W.: Modified Thermal-Optical Analysis Using  
Spectral Absorption Selectivity To Distinguish Black Carbon from Pyrolyzed Organic Carbon,



526 [Environ. Sci. Technol., 42, 8459–8464, 10.1021/es800448n, 2008.](#)

527 Huang, R. J., Zhang, Y., Bozzetti, C., Ho, K. F., Cao, J. J., Han, Y., Daellenbach, K. R., Slowik, J.  
528 G., Platt, S. M., Canonaco, F., Zotter, P., Wolf, R., Pieber, S. M., Bruns, E. A., Crippa, M., Ciarelli,  
529 G., Piazzalunga, A., Schwikowski, M., Abbaszade, G., Schnelle-Kreis, J., Zimmermann, R., An,  
530 Z., Szidat, S., Baltensperger, U., El Haddad, I., and Prevot, A. S.: High secondary aerosol  
531 contribution to particulate pollution during haze events in China, *Nature*, 514, 218-222,  
532 10.1038/nature13774, 2014.

533 Ji, D., Zhang, J., He, J., Wang, X., BoPanga, Liua, Z., Wang, L., and Wang, Y.: Characteristics of  
534 atmospheric organic and elemental carbon aerosols in urban Beijing, China, *Atmos. Environ.*, 293-  
535 306, 10.1016/j.atmosenv.2015.11.020, 2016.

536 Kirillova, E. N., Andersson, A., Han, J., Lee, M., and Gustafsson, O.: Sources and light absorption  
537 of water-soluble organic carbon aerosols in the outflow from northern China, *Atmos. Chem. Phys.*,  
538 14, 1413-1422, 10.5194/acp-14-1413-2014, 2014.

539 Laskin, A., Laskin, J., and Nizkorodov, S. A.: Chemistry of atmospheric brown carbon, *Chemical*  
540 *Reviews*, 115, 4335-4382, 10.1021/cr5006167, 2015.

541 Lei, Y., Shen, Z., Zhang, T., Zhang, Q., Wang, Q., Sun, J., Gong, X., Cao, J., Xu, H., Liu, S., and  
542 Yang, L.: Optical source profiles of brown carbon in size-resolved particulate matter from typical  
543 domestic biofuel burning over Guanzhong Plain, China, *Sci. Total. Environ.*, 622-623, 244-251,  
544 10.1016/j.scitotenv.2017.11.353, 2018.

545 Lelieveld, J., Evans, J. S., Fnais, M., Giannadaki, D., and Pozzer, A.: The contribution of outdoor  
546 air pollution sources to premature mortality on a global scale, *Nature*, 525, 367-371,  
547 10.1038/nature15371, 2015.

548 Li, C., He, Q., Hettiyadura, A. P. S., Kafer, U., Shmul, G., Meidan, D., Zimmermann, R., Brown,  
549 S. S., George, C., Laskin, A., and Rudich, Y.: Formation of secondary brown carbon in biomass  
550 burning aerosol proxies through NO<sub>3</sub> radical reactions, *Environ. Sci. Technol.*, 54, 1395-1405,  
551 10.1021/acs.est.9b05641, 2020.

552 Lim, H.-J. and Turpin, B. J.: Origins of primary and secondary organic aerosol in Atlanta: results  
553 of time-resolved measurements during the Atlanta supersite experiment, *Environ. Sci. Technol.*,  
554 36, 4489-4496, 10.1021/es0206487 2002.

555 Liu, S., Aiken, A. C., Gorkowski, K., Dubey, M. K., Cappa, C. D., Williams, L. R., Herndon, S.  
556 C., Massoli, P., Fortner, E. C., Chhabra, P. S., Brooks, W. A., Onasch, T. B., Jayne, J. T., Worsnop,



557 D. R., China, S., Sharma, N., Mazzoleni, C., Xu, L., Ng, N. L., Liu, D., Allan, J. D., Lee, J. D.,  
 558 Fleming, Z. L., Mohr, C., Zotter, P., Szidat, S., and Prevot, A. S. H.: Enhanced light absorption by  
 559 mixed source black and brown carbon particles in UK winter, *Nat. Commun.*, 6, 8435,  
 560 10.1038/ncomms9435, 2015.

561 Liu, X., Zhang, Y.-L., Peng, Y., Xu, L., Zhu, C., Cao, F., Zhai, X., Haque, M. M., Yang, C., Chang,  
 562 Y., Huang, T., Xu, Z., Bao, M., Zhang, W., Fan, M., and Lee, X.: Chemical and optical properties  
 563 of carbonaceous aerosols in Nanjing, eastern China: regionally transported biomass burning  
 564 contribution, *Atmos. Chem. Phys.*, 19, 11213-11233, 10.5194/acp-19-11213-2019, 2019.

565 Massabò, D., Caponi, L., Bove, M. C., and Prati, P.: Brown carbon and thermal-optical analysis:  
 566 A correction based on optical multi-wavelength apportionment of atmospheric aerosols, *Atmos.*  
 567 *Environ.*, 125, 119-125, 10.1016/j.atmosenv.2015.11.011, 2016.

568 Pio, C., Cerqueira, M., Harrison, R. M., Nunes, T., Mirante, F., Alves, C., Oliveira, C., Sanchez de  
 569 la Campa, A., Artíñano, B., and Matos, M.: OC/EC ratio observations in Europe: Re-thinking the  
 570 approach for apportionment between primary and secondary organic carbon, *Atmos. Environ.*, 45,  
 571 6121-6132, 10.1016/j.atmosenv.2011.08.045, 2011.

572 Petit, J. E., Favez, O., Albinet, A., and Canonaco, F.: A user-friendly tool for comprehensive  
 573 evaluation of the geographical origins of atmospheric pollution: Wind and trajectory analyses,  
 574 *Environ. Model. Softw.*, 88, 183-187, 10.1016/j.envsoft.2016.11.022, 2017.

575 Rolph, G., Stein, A., and Stunder, B.: Real-time Environmental Applications and Display sYstem:  
 576 READY, *Environ. Model. Softw.*, 95, 210-228, 10.1016/j.envsoft.2017.06.025, 2017.

577 Sahu, M., Hu, S., Ryan, P. H., Le Masters, G., Grinshpun, S. A., Chow, J. C., and Biswas, P.:  
 578 Chemical compositions and source identification of PM<sub>2.5</sub> aerosols for estimation of a diesel source  
 579 surrogate, *Sci. Total. Environ.*, 409, 2642-2651, 10.1016/j.scitotenv.2011.03.032, 2011.

580 Sandradewi, J., Prévôt, A. S. H., Szidat, S., Perron, N., Alfarra, M. R., Lanz, V. A., Weingartner,  
 581 E., and Baltensperger, U.: Using Aerosol Light Absorption Measurements for the Quantitative  
 582 Determination of Wood Burning and Traffic Emission Contributions to Particulate Matter, *Environ.*  
 583 *Sci. Technol.*, 42, 3316-3323, 10.1021/es702253m, 2008.

584 Saleh, R., Robinson, E. S., Tkacik, D. S., Ahern, A. T., Liu, S., Aiken, A. C., Sullivan, R. C., Presto,  
 585 A. A., Dubey, M. K., Yokelson, R. J., Donahue, N. M., and Robinson, A. L.: Brownness of organics  
 586 in aerosols from biomass burning linked to their black carbon content, *Nat. Geosci.*, 7, 647-650,  
 587 10.1038/ngeo2220, 2014.

Satish, R., Shamjad, P., Thamban, N., Tripathi, S., and Rastogi, N.: Temporal characteristics of brown carbon over the central Indo-Gangetic Plain, *Environ. Sci. Technol.*, 51, 6765-6772, 10.1021/acs.est.7b00734, 2017.

Sullivan, A. P., Hodas, N., Turpin, B. J., Skog, K., Keutsch, F. N., Gilardoni, S., Paglione, M., Rinaldi, M., Decesari, S., Facchini, M. C., Poulain, L., Herrmann, H., Wiedensohler, A., Nemitz, E., Twigg, M. M., and Collett Jr, J. L.: Evidence for ambient dark aqueous SOA formation in the Po Valley, Italy, *Atmos. Chem. Phys.*, 16, 8095-8108, 10.5194/acp-16-8095-2016, 2016.

Turpin, B. J. and Huntzicker, J.: Identification of secondary organic aerosol episodes and quantitation of primary and secondary organic aerosol concentrations during SCAQS, *Atmos. Environ.*, 29, 3527-3544, 1995.

U.S.EPA: Review of sunset organic and elemental carbon (OC and EC) measurements during EPA's sunset carbon evaluation project, prepared by Sonoma Technology, Inc., CA 94954-6515, prepared for U.S. Environmental Protection Agency, NC 27711, 2019.

Wang, J., Nie, W., Cheng, Y., Shen, Y., Chi, X., Wang, J., Huang, X., Xie, Y., Sun, P., Xu, Z., Qi, X., Su, H., and Ding, A.: Light absorption of brown carbon in eastern China based on 3-year multi-wavelength aerosol optical property observations and an improved absorption Ångström exponent segregation method, *Atmos. Chem. Phys.*, 18, 9061-9074, 10.5194/acp-18-9061-2018, 2018.

Wang, P., Cao, J. J., Shen, Z. X., Han, Y. M., Lee, S. C., Huang, Y., Zhu, C. S., Wang, Q. Y., Xu, H. M., and Huang, R. J.: Spatial and seasonal variations of PM<sub>2.5</sub> mass and species during 2010 in Xi'an, China, *Sci. Total. Environ.*, 508, 477-487, 10.1016/j.scitotenv.2014.11.007, 2015.

Wang, Y., Hopke, P. K., Rattigan, O. V., Xia, X., Chalupa, D. C., and Utell, M. J.: Characterization of residential wood combustion particles using the two-wavelength aethalometer, *Environ. Sci. Technol.*, 45, 7387-7393, 10.1021/es2013984, 2011.

Wang, Y., Hopke, P. K., and Rattigan, O. V.: A new indicator of fireworks emissions in Rochester, New York, *Environ. Monit. Assess.*, 184, 7293-7297, 10.1007/s10661-011-2497-5, 2012a.

Wang, Y., Hopke, P. K., Rattigan, O. V., Chalupa, D. C., and Utell, M. J.: Multiple-year black carbon measurements and source apportionment using delta-C in Rochester, New York, *J. Air Waste Manag. Assoc.*, 62, 880-887, 10.1080/10962247.2012.671792, 2012b.

Wu, C. and Yu, J. Z.: Determination of primary combustion source organic carbon-to-elemental carbon (OC/EC) ratio using ambient OC and EC measurements: secondary OC-EC correlation minimization method, *Atmos. Chem. Phys.*, 16, 5453-5465, 10.5194/acp-16-5453-2016, 2016.

Wu, G., Wan, X., Gao, S., Fu, P., Yin, Y., Li, G., Zhang, G., Kang, S., Ram, K., and Cong, Z.: Humic-Like Substances (HULIS) in Aerosols of Central Tibetan Plateau (Nam Co, 4730 m asl): Abundance, Light Absorption Properties, and Sources, *Environ. Sci. Technol.*, 52, 7203-7211, 10.1021/acs.est.8b01251, 2018.

Wu, G., Ram, K., Fu, P., Wang, W., Zhang, Y., Liu, X., Stone, E. A., Pradhan, B. B., Dangol, P. M., Panday, A. K., Wan, X., Bai, Z., Kang, S., Zhang, Q., and Cong, Z.: Water-Soluble Brown Carbon in Atmospheric Aerosols from Godavari (Nepal), a Regional Representative of South Asia, *Environ. Sci. Technol.*, 53, 3471-3479, 10.1021/acs.est.9b00596, 2019.

Wu, G., Wan, X., Ram, K., Li, P., Liu, B., Yin, Y., Fu, P., Loewen, M., Gao, S., Kang, S., Kawamura, K., Wang, Y., and Cong, Z.: Light absorption, fluorescence properties and sources of brown carbon aerosols in the Southeast Tibetan Plateau, *Environ. Pollut.*, 257, 113616, 10.1016/j.envpol.2019.113616, 2020.

Xu, X. and Akhtar, U. S.: Identification of potential regional sources of atmospheric total gaseous mercury in Windsor, Ontario, Canada using hybrid receptor modeling, *Atmos. Chem. Phys.*, 10, 7073-7083, 10.5194/acp-10-7073-2010, 2010.

Yan, C., Zheng, M., Bosch, C., Andersson, A., Desyaterik, Y., Sullivan, A. P., Collett, J. L., Zhao, B., Wang, S., He, K., and Gustafsson, O.: Important fossil source contribution to brown carbon in Beijing during winter, *Sci. Rep.*, 7, 10.1038/srep43182, 2017.

Yan, C., Zheng, M., Shen, G., Cheng, Y., Ma, S., Sun, J., Cui, M., Zhang, F., Han, Y., and Chen, Y.: Characterization of carbon fractions in carbonaceous aerosols from typical fossil fuel combustion sources, *Fuel*, 254, 10.1016/j.fuel.2019.115620, 2019.

Yang, F., Tan, J., Zhao, Q., Du, Z., He, K., Ma, Y., Duan, F., Chen, G., and Zhao, Q.: Characteristics of PM<sub>2.5</sub> speciation in representative megacities and across China, *Atmos. Chem. Phys.*, 11, 5207-5219, 10.5194/acp-11-5207-2011, 2011.

Zhang, Q., Shen, Z., Zhang, L., Zeng, Y., Ning, Z., Zhang, T., Lei, Y., Wang, Q., Li, G., Sun, J., Westerdahl, D., Xu, H., and Cao, J.: Investigation of primary and secondary particulate brown carbon in two Chinese cities of Xi'an and Hong Kong in wintertime, *Environ. Sci. Technol.*, 54, 3803-3813, 10.1021/acs.est.9b05332, 2020.

Zhang, W. and Zhang, Y.: Oxygen isotope anomaly ( $\Delta^{17}\text{O}$ ) in atmospheric nitrate: a review, *Chinese Sci. Bull.*, 64, 649-662, 10.1360/n972018-01028, 2019.

Zhang, W., Zhang, Y.-L., Cao, F., Xiang, Y., Zhang, Y., Bao, M., Liu, X., and Lin, Y.-C.: High time-

resolved measurement of stable carbon isotope composition in water-soluble organic aerosols:  
method optimization and a case study during winter haze in eastern China, *Atmos. Chem. Phys.*,  
19, 11071-11087, 10.5194/acp-19-11071-2019, 2019.

Zhang, X., Lin, Y.-H., Surratt, J. D., Zotter, P., Prevot, A. S. H., and Weber, R. J.: Light-absorbing  
soluble organic aerosol in Los Angeles and Atlanta: a contrast in secondary organic aerosol,  
*Geophys. Res. Lett.*, 38, 10.1029/2011gl049385, 2011.

Zhang, Y. and Kang, S.: Characteristics of carbonaceous aerosols analyzed using a  
multiwavelength thermal/optical carbon analyzer: a case study in Lanzhou City, *Sci. China Earth  
Sci.*, 62, 389-402, 10.1007/s11430-017-9245-9, 2019.

Zhang, Y., Ren, H., Sun, Y., Cao, F., Chang, Y., Liu, S., Lee, X., Agrios, K., Kawamura, K., Liu,  
D., Ren, L., Du, W., Wang, Z., Prevot, A. S. H., Szida, S., and Fu, P.: High contribution of nonfossil  
sources to submicrometer organic aerosols in Beijing, China, *Environ. Sci. Technol.*, 51, 7842-  
7852, 10.1021/acs.est.7b01517, 2017.

Zhang, Y.-L. and Cao, F.: Is it time to tackle PM<sub>2.5</sub> air pollutions in China from biomass-burning  
emissions?, *Environ. Pollut.*, 202, 217-219, 10.1016/j.envpol.2015.02.005, 2015a.

Zhang, Y. L. and Cao, F.: Fine particulate matter (PM<sub>2.5</sub>) in China at a city level, *Sci. Rep.*, 5,  
14884, 10.1038/srep14884, 2015b.

Zhou, S., Wang, T., Wang, Z., Li, W., Xu, Z., Wang, X., Yuan, C., Poon, C. N., Louie, P. K. K.,  
Luk, C. W. Y., and Wang, W.: Photochemical evolution of organic aerosols observed in urban  
plumes from Hong Kong and the Pearl River Delta of China, *Atmos. Environ.*, 88, 219-229,  
10.1016/j.atmosenv.2014.01.032, 2014.

Zhu, C. S., Cao, J. J., Tsai, C. J., Shen, Z. X., Han, Y. M., Liu, S. X., and Zhao, Z. Z.: Comparison  
and implications of PM<sub>2.5</sub> carbon fractions in different environments, *Sci. Total. Environ.*, 466-  
467, 203-209, 10.1016/j.scitotenv.2013.07.029, 2014.

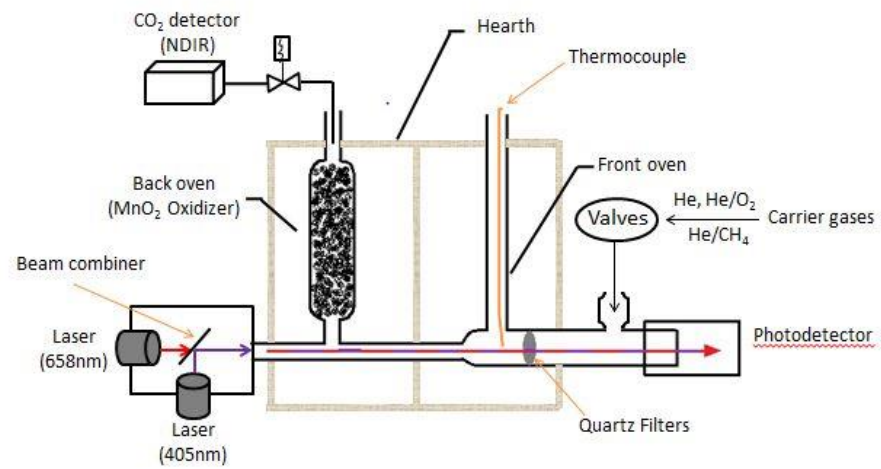

**Figure 1.** Principle and structure of the Sunset semi-continuous carbon analyzer.

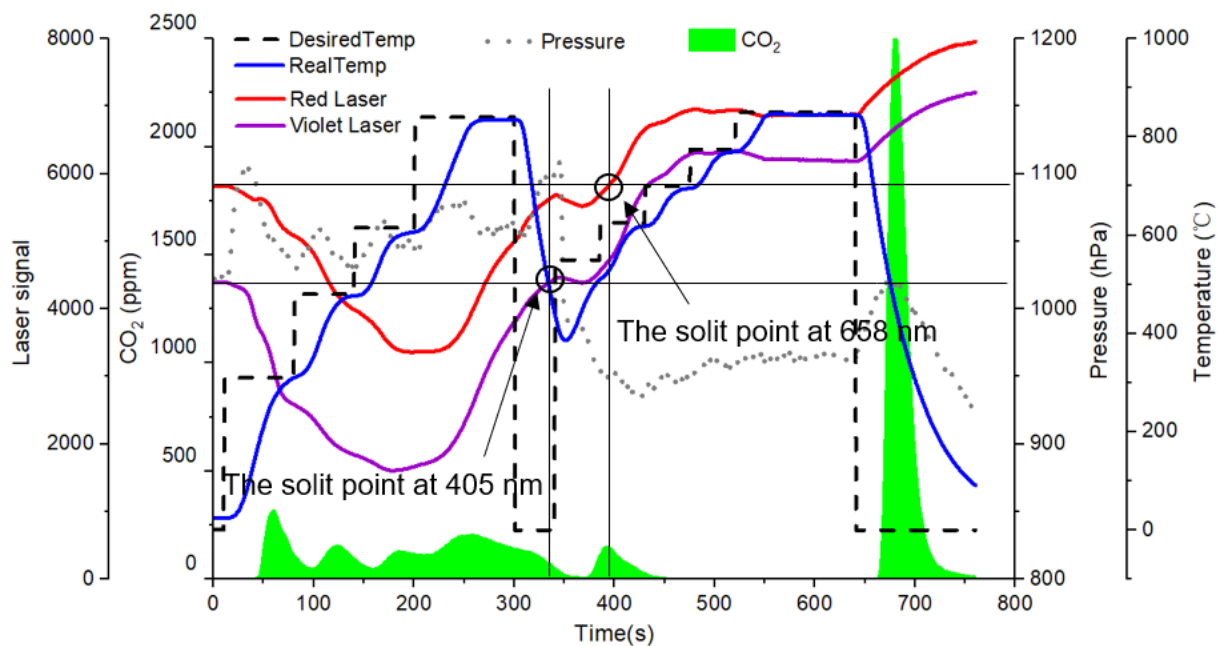

**Figure 2.** Example thermogram of sample analysis using the two-wavelength Sunset semi-continuous carbon analyzer.

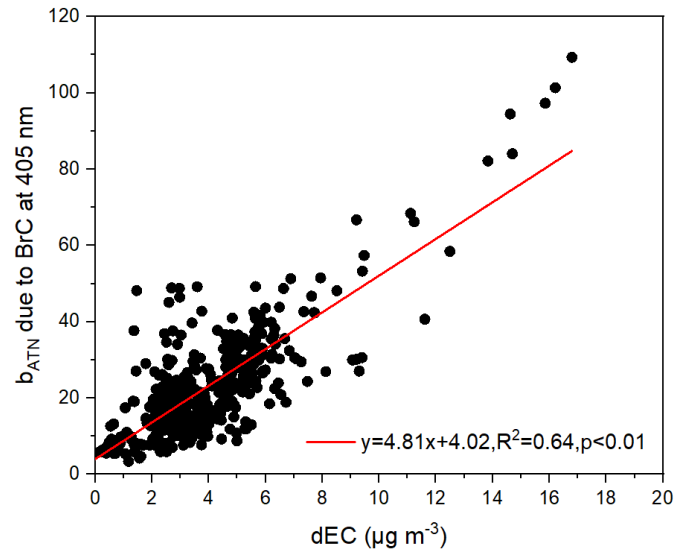

680

681

**Figure 3.** Relationship between the  $b_{\text{ATN}}$  due to BrC at 405 nm and the dEC concentrations.

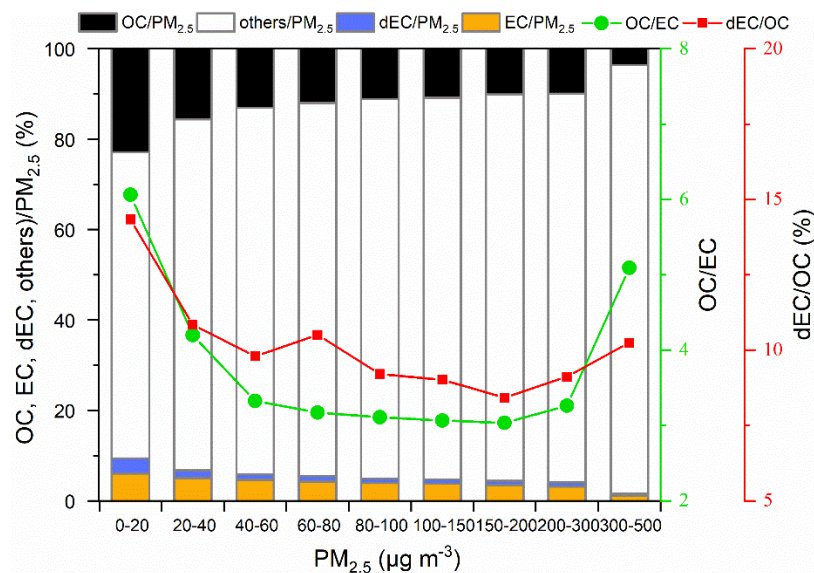

**Figure 4.** Carbonaceous species fractions of  $PM_{2.5}$  and OC/EC ratios at different  $PM_{2.5}$  concentration intervals at NUIST from June 2015 to August 2016.



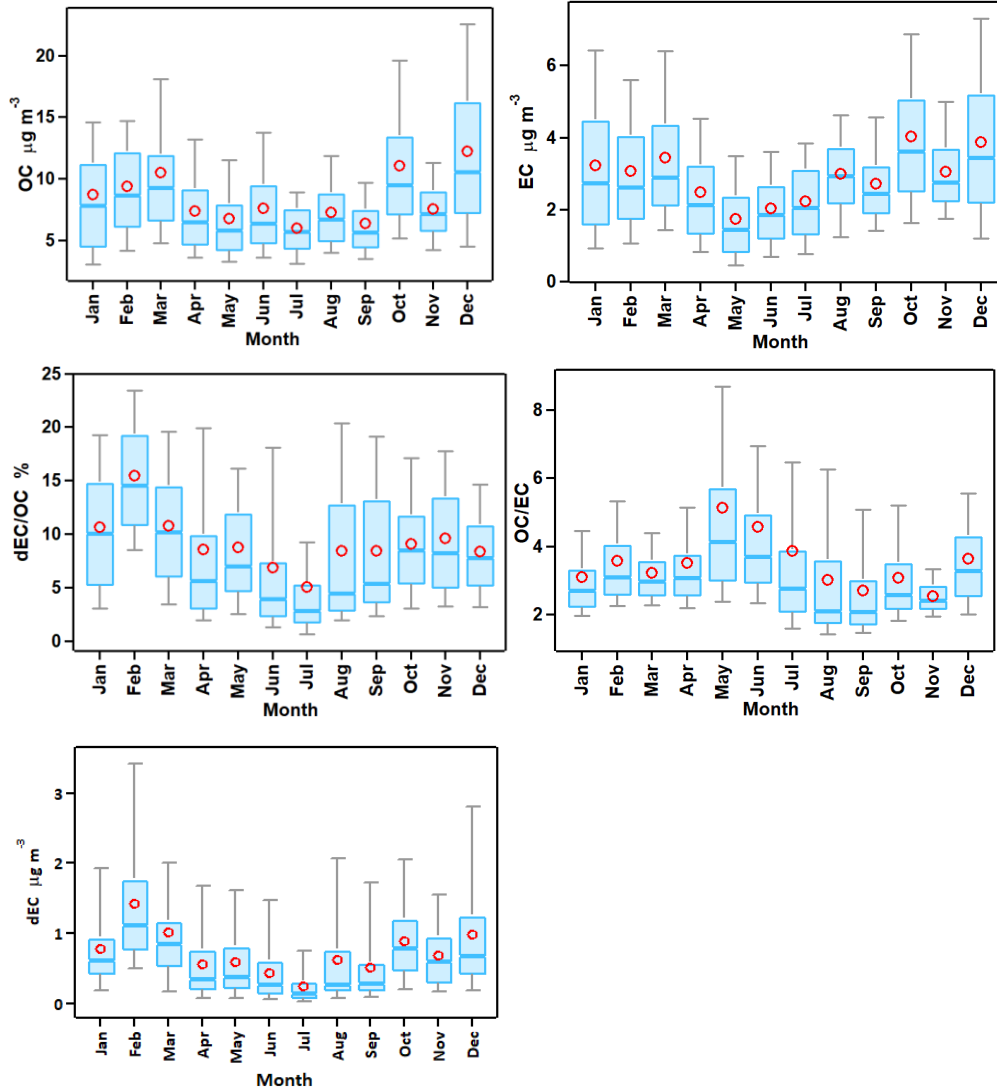

**Figure 5.** Monthly variations of OC, EC, dEC, dEC/OC and OC/EC ratios at NUIST from June 2015 to August 2016. The boundary of the box indicates the 25% and 75% percentile, respectively. The lower and upper whiskers indicate the 10% and 90% percentile, respectively. The red circle within the box marks the average while the line within the box marks the median.

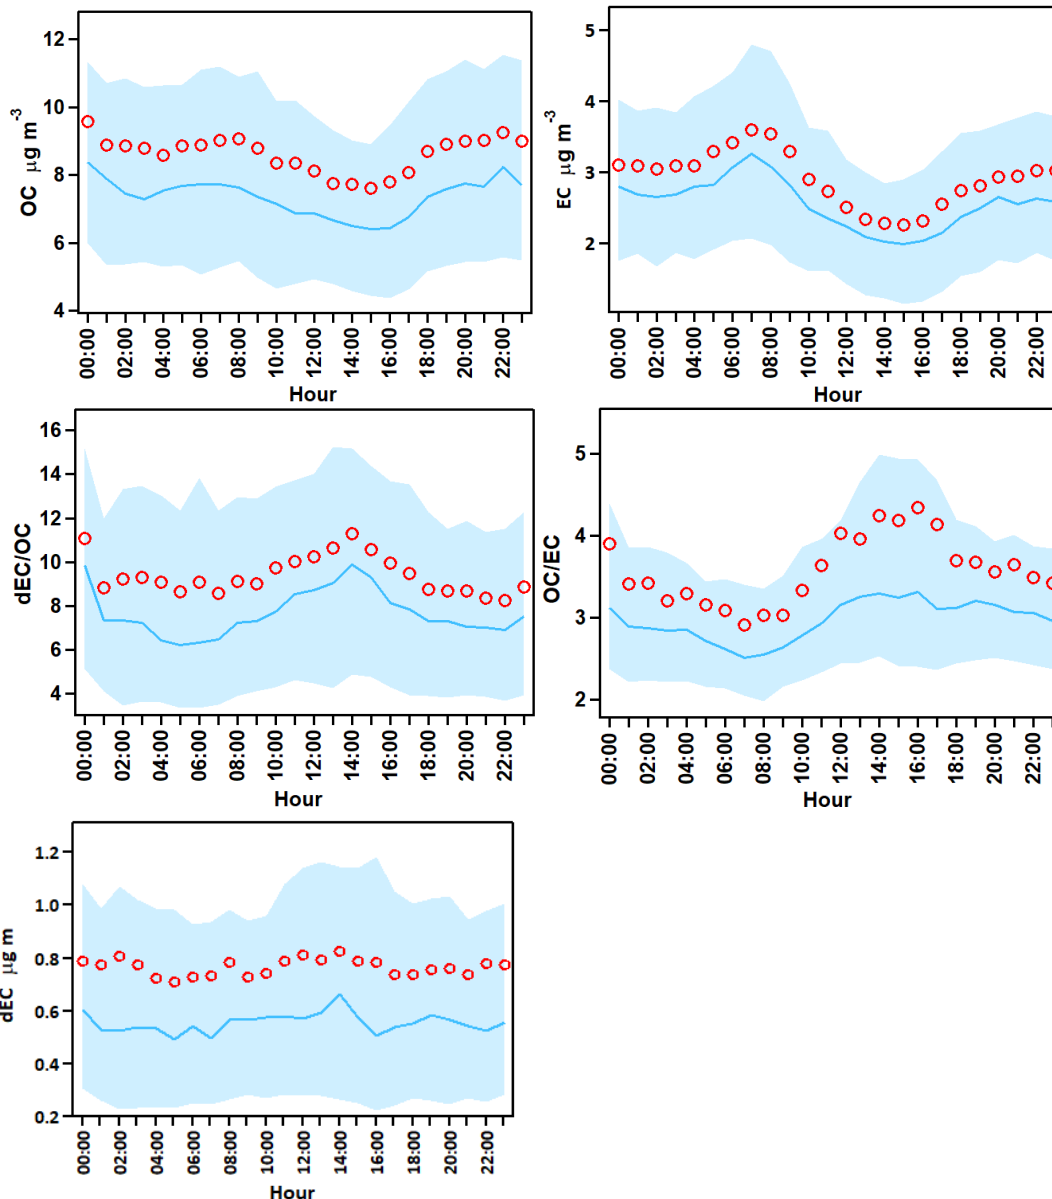

**Figure 6.** Diurnal variations of OC, EC, dEC concentrations, dEC/OC and OC/EC ratios during the study period. The boundary of the shaded area indicates the 25% and 75% percentile, respectively. The red circle marks the average while the blue line marks the median.

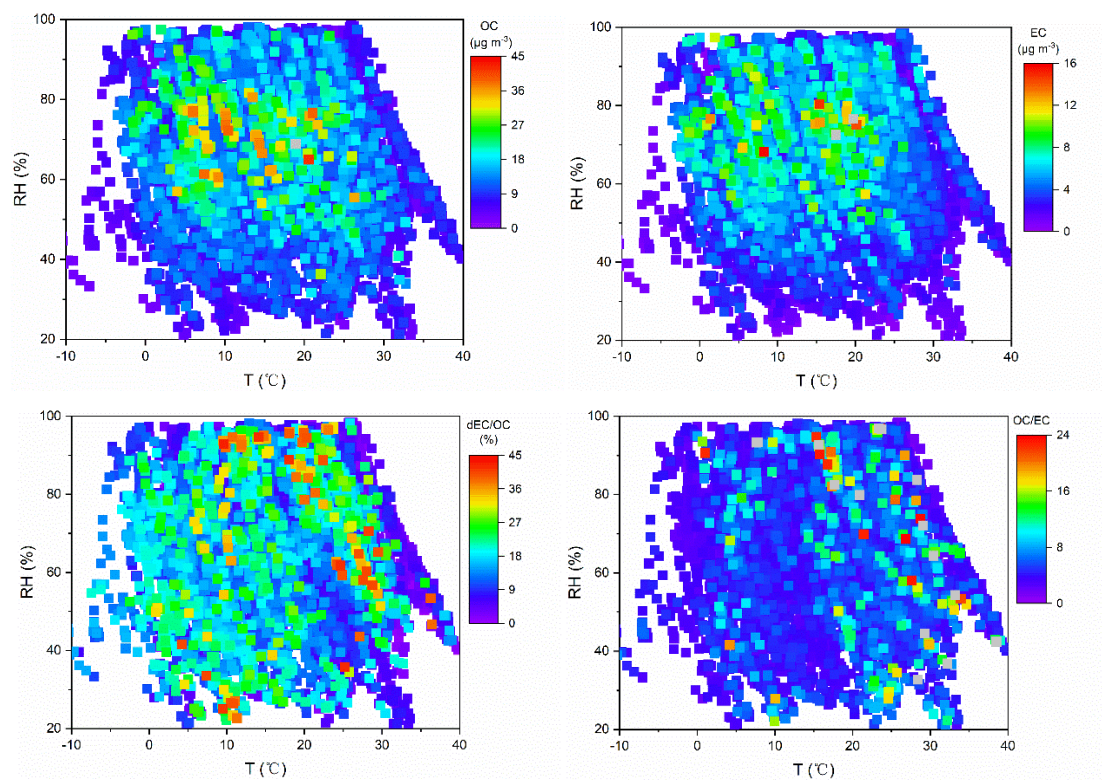

**Figure 7.** RH/T dependence of OC, EC, dEC/OC and OC/EC ratios during the study periods.

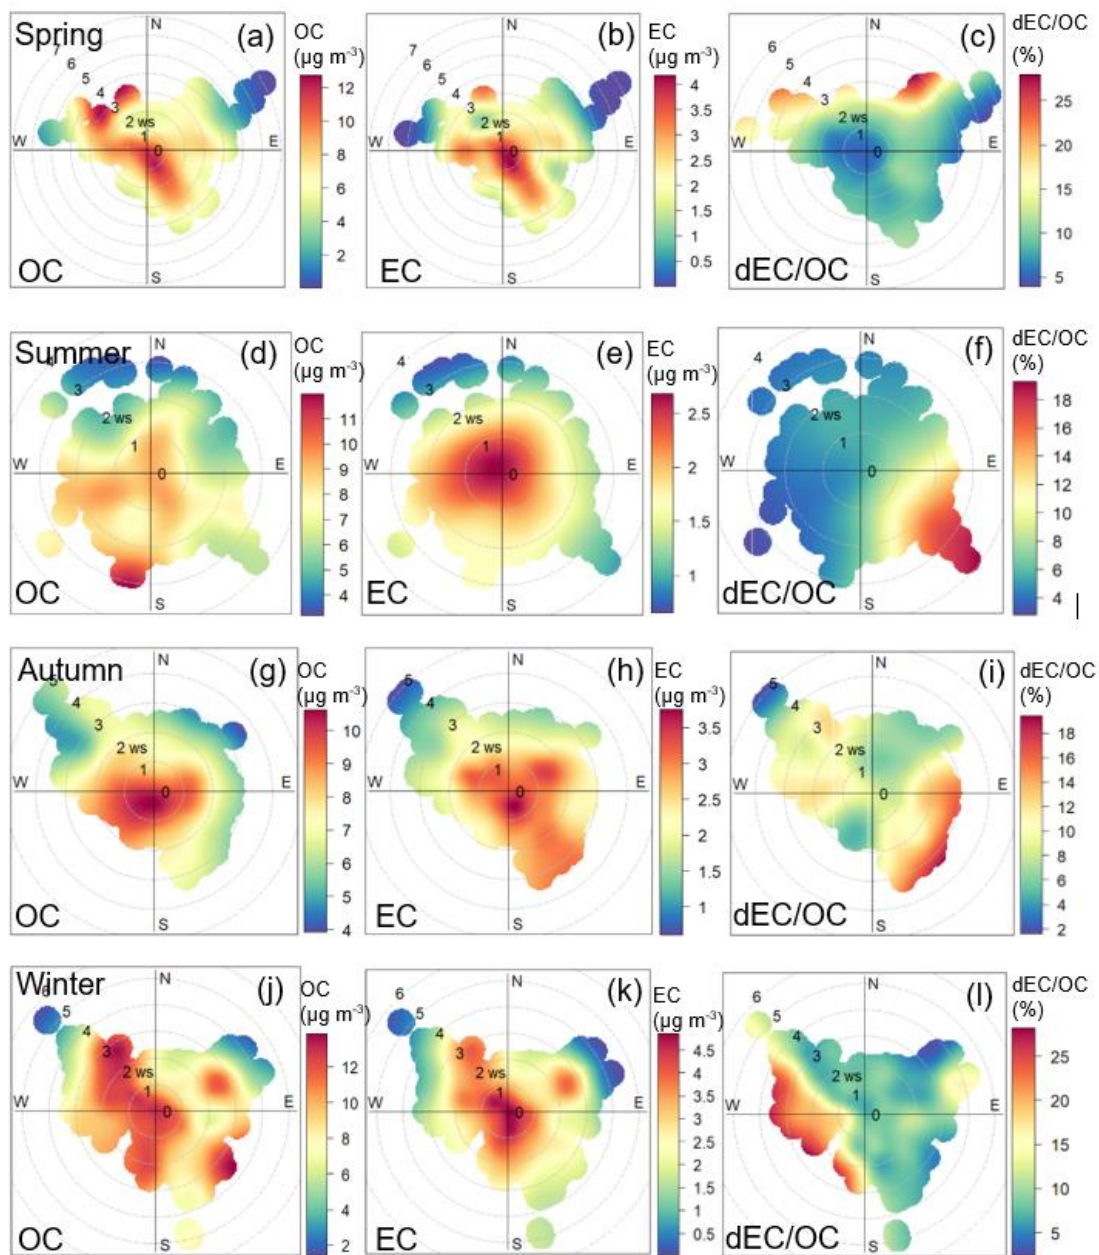

**Figure 8.** Wind rose of OC, EC and dEC/OC in spring ((a), (b), (c)), summer ((d), (e), (f)), autumn ((g), (h), (i)) and winter ((j), (k), (l)).



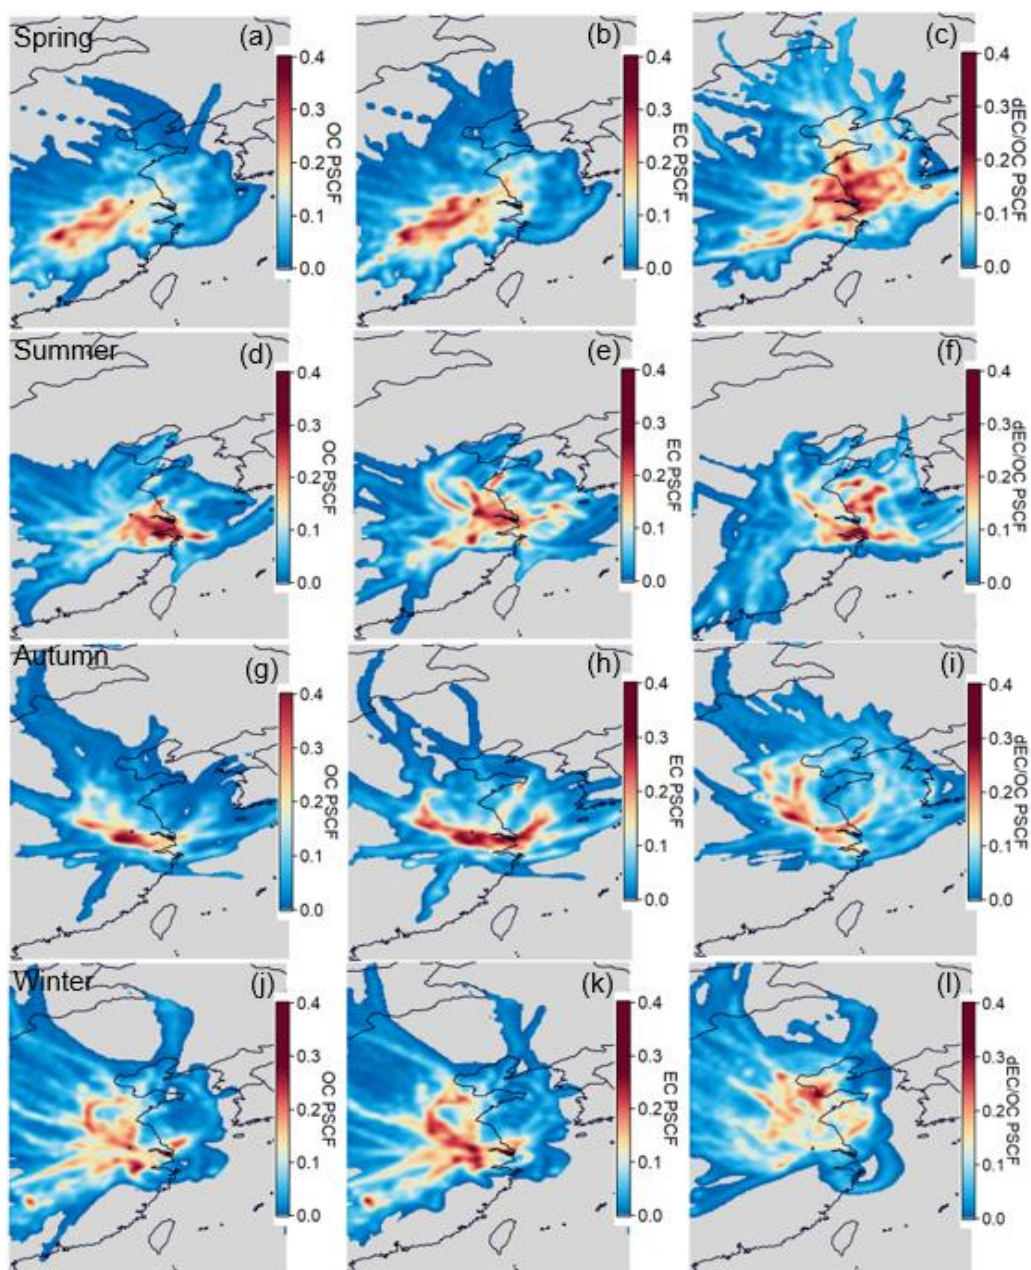

**Figure 9.** PSCF map for OC, EC and dEC/OC in spring ((a), (b), (c)), summer ((d), (e), (f)), autumn ((g), (h), (i)) and winter ((j), (k), (l)).

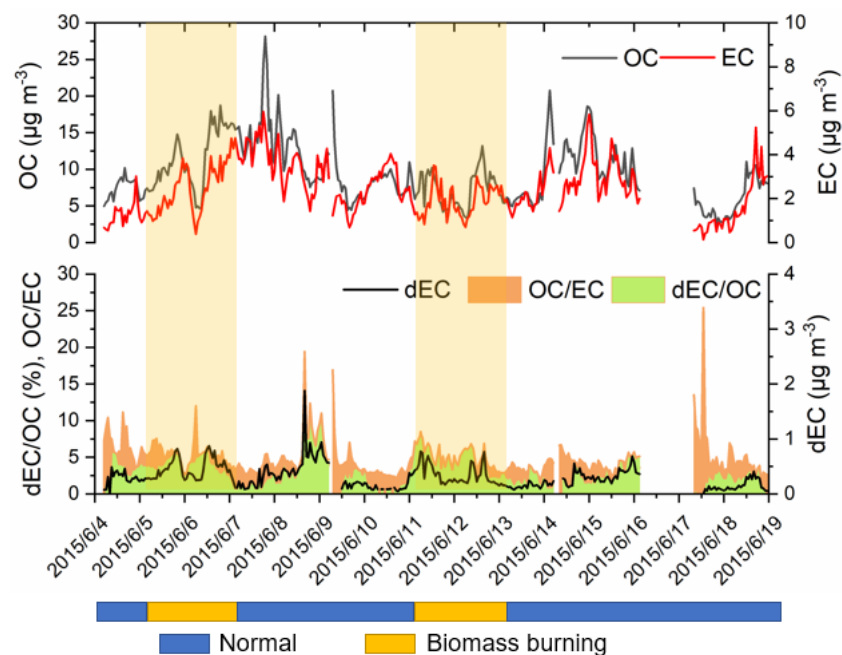

**Figure 10.** Time series of OC, EC, dEC/OC, dEC and OC/EC from 4 June 2015 to 19 June 2015. The period was divided into normal days (blue bar) and biomass burning days (yellow bar). The yellow shadow represents the biomass burning periods.

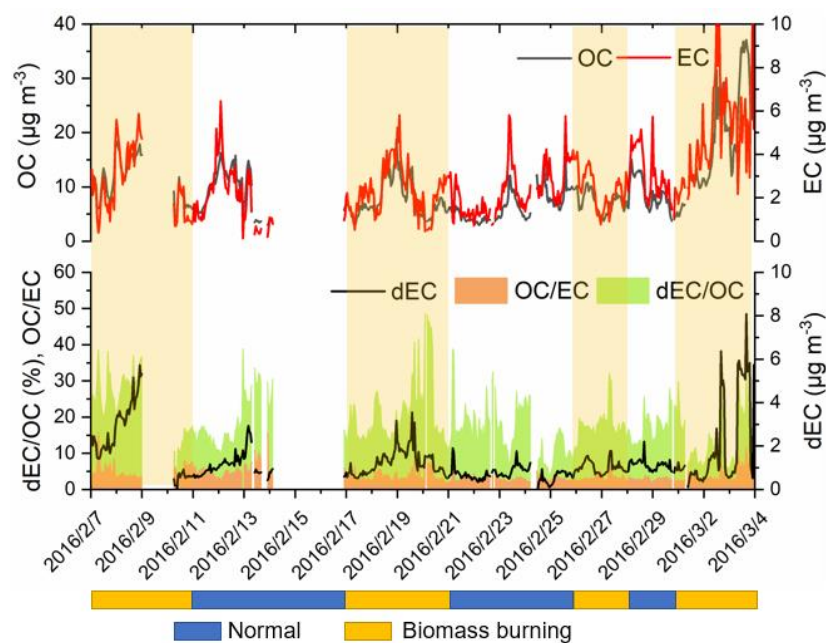

**Figure 11.** Time series of OC, EC, dEC/OC, dEC and OC/ EC from 7 February 2016 to 3 Mar 2016. The period was divided into normal days (blue bar) and biomass burning days (yellow bar). The yellow shadow represents the biomass burning periods.

715 **Table 1.** Statistical summary on the PM<sub>2.5</sub> and carbon species concentrations.

| N=5113                                  | Annual  |                       |        |     |       | Spring  | Summer  | Autumn  | winter  |
|-----------------------------------------|---------|-----------------------|--------|-----|-------|---------|---------|---------|---------|
|                                         | Average | Standard<br>Deviation | Median | Min | Max   | Average | Average | Average | Average |
| PM <sub>2.5</sub> (µg m <sup>-3</sup> ) | 77.2    | 48.6                  | 65.0   | 2.5 | 458.1 | 72.1    | 47.9    | 70.5    | 91.8    |
| OC (µg m <sup>-3</sup> )                | 8.9     | 5.5                   | 7.5    | 0.5 | 45.8  | 8.4     | 7.2     | 8.4     | 10.2    |
| EC (µg m <sup>-3</sup> )                | 3.1     | 2.0                   | 2.6    | 0.0 | 17.6  | 2.6     | 2.3     | 3.3     | 3.4     |
| OC/EC                                   | 3.5     | 2.4                   | 2.9    | 1.0 | 29.3  | 3.9     | 4.0     | 2.8     | 3.4     |
| dEC (µg m <sup>-3</sup> )               | 0.8     | 0.8                   | 0.6    | 0.0 | 8.1   | 0.8     | 0.5     | 0.7     | 1.1     |
| dEC/OC (%)                              | 10.0    | 7.2                   | 8.6    | 0.0 | 48.2  | 9.5     | 6.9     | 9.0     | 11.3    |
| dEC/EC (%)                              | 22.3    | 16.7                  | 18.5   | 0.1 | 97.8  | 24.5    | 18.2    | 18.7    | 25.9    |
| OC/PM <sub>2.5</sub> (%)                | 12.8    | 5.6                   | 11.6   | 0.7 | 66.2  | 13.2    | 14.4    | 14.1    | 11.1    |
| EC/PM <sub>2.5</sub> (%)                | 4.3     | 2.3                   | 3.9    | 0.0 | 33.2  | 3.9     | 4.7     | 5.8     | 3.7     |
| dEC/PM <sub>2.5</sub> (%)               | 1.3     | 1.2                   | 0.9    | 0.0 | 17.6  | 1.4     | 1.3     | 1.2     | 1.3     |



**Table 2.** Statistics of OC, EC, OC/EC, dEC and dEC/OC during biomass burning days and normal days. The values represent average±standard deviation.

|                                                       |                      | OC<br>( $\mu\text{g m}^{-3}$ ) | EC<br>( $\mu\text{g m}^{-3}$ ) | OC/EC   | dEC<br>( $\mu\text{g m}^{-3}$ ) | dEC/OC<br>(%) |
|-------------------------------------------------------|----------------------|--------------------------------|--------------------------------|---------|---------------------------------|---------------|
| June 4 <sup>th</sup> to<br>19 <sup>th</sup>           | Normal days          | 9.5±4.5                        | 2.6±1.3                        | 4.3±2.3 | 0.2±0.1                         | 2.5±1.3       |
|                                                       | Biomass burning days | 9.0±3.6                        | 2.0±0.9                        | 4.8±1.6 | 0.4±0.2                         | 4.6±1.4       |
| February<br>7 <sup>th</sup> to Mar<br>3 <sup>rd</sup> | Normal days          | 7.5±3.3                        | 2.5±1.2                        | 3.3±1.3 | 0.8±0.3                         | 12.7±5.6      |
|                                                       | Biomass burning days | 11.2±7.2                       | 3.1±1.9                        | 4.0±1.8 | 1.7±1.4                         | 15.4±7.8      |

## Supplement

### Content of this file

#### Tables

**Table S1.** Temperature protocol of the modified NIOSH 5040 method used in this study.

**Table S2.** Comparisons of the concentrations of OC and EC in PM<sub>2.5</sub> between different cities in China and around the world using the TOT method applied in the NIOSH 5040 protocol.

**Table S3.** Statistics on the meteorological factors in four seasons at NUIST site during the study period.

#### Figures

**Figure S1.** Correlations between the real-time OC, EC and TC concentrations and sampling OC, EC and TC concentrations during the corresponding periods.

**Figure S2.** Measured  $b_{ATN}$  at 405 nm compared with  $b_{ATN}$  fitted from Eq. (3) using a two-component model

**Figure S3.** dEC/OC variation at different intervals of OC/EC ratios in spring (a), summer (b), autumn (c) and winter (d).

**Figure S4.** Time variations of OC, EC, dEC, dEC/OC, OC/EC and fire points obtained from the Fire Information for Resource Management System (FIRMS) derived from the Moderate Resolution Imaging Spectroradiometer (MODIS).

**Figure S5.** 48-h back trajectories at 500 m from the study site from 8 June 2015 to 9 June 2015(a), 11 June 2015 to 12 June 2015 (b), respectively and from 7 February 2016 to 10 February 2016 (c) and 26 February 2016 to 27 February 2016 (d), respectively.

### Reference for the supplement

748 **Table S1.** Temperature protocol of the modified NIOSH 5040 method used in this study.

| Gas                  | Temperature(°C) | Time(s) |
|----------------------|-----------------|---------|
| He-1                 | 310             | 70      |
| He-2                 | 480             | 60      |
| He-3                 | 615             | 60      |
| He-4                 | 840             | 100     |
| He/O <sub>2</sub> -1 | 550             | 45      |
| He/O <sub>2</sub> -2 | 625             | 45      |
| He/O <sub>2</sub> -3 | 700             | 45      |
| He/O <sub>2</sub> -4 | 775             | 45      |
| He/O <sub>2</sub> -5 | 850             | 120     |
| CH <sub>4</sub> /He  | 0               | 120     |

749

750 **Table S2.** Comparisons of the concentrations of OC and EC in PM<sub>2.5</sub> between different cities in  
751 China and around the world using the TOT method applied in the NIOSH 5040 protocol.

| Country | City or region | Site type         | Sampling period   | OC   | EC   | OC/EC | References              |
|---------|----------------|-------------------|-------------------|------|------|-------|-------------------------|
| China   | Beijing        | Urban             | Mar 2013-Feb 2014 | 14.0 | 4.1  | 3.4   | (Ji et al., 2016)       |
| China   | Shanghai       | Urban             | Oct 2005-Jul 2006 | 14.7 | 2.8  | 5.0   | (Feng et al., 2009)     |
| China   | Chengdu        | Urban             | May 2012-Apr 2013 | 19.0 | 4.6  | 4.3   | (Chen et al., 2014)     |
| China   | Chongqing      | Urban             | May 2012-Apr 2013 | 15.2 | 4.0  | 3.8   | (Chen et al., 2014)     |
| China   | Nanjing        | Suburban          | Annual 2014       | 5.7  | 3.2  | 1.8   | (Chen et al., 2017)     |
| China   | Guangzhou      | Rural             | Mar 2012–Feb 2013 | 6.1  | 0.8  |       | (Lai et al., 2016)      |
| China   | Mount Heng     | Set at 1269 m asl | Mar-May 2009      | 3.0  | 0.5  | 5.2   | (Zhou et al., 2012)     |
| Mexico  | Mexico City    | Suburban          | Mar 2006          | 6.4  | 2.1  | 4.5   | (Yu et al., 2009)       |
| India   | Delhi          | Suburban          | Nov 2010-Feb 2011 | 54.1 | 10.4 | 5.2   | (Tiwari et al., 2012)   |
| America | Philadelphia   | Suburban          | Jul 2002-Aug 2002 | 4.8  | 0.4  | 18.7  | (Jeong et al., 2004)    |
| America | Rochester      | Suburban          | Jun 2002          | 9.2  | 0.3  | 23.6  | (Jeong et al., 2004)    |
| Spain   | Aragón         | Urban             | Dec 2011          | 3.6  | 1.1  | 4.7   | (Escudero et al., 2015) |
| China   | Nanjing        | Suburban          | Jun 2015-Aug 2016 | 8.6  | 2.9  | 3.6   | This study              |

**Table S3.** Statistics on the meteorological factors in four seasons at NUIST site during the study period.

|        | Atmospheric<br>Pressure<br>(hPa) | Relative<br>Humidity<br>(%) | Temperature<br>(°C) | Wind Speed<br>(m s <sup>-1</sup> ) | Total<br>Precipitation<br>(mm) |
|--------|----------------------------------|-----------------------------|---------------------|------------------------------------|--------------------------------|
| Spring | 1009.9                           | 66.0                        | 16.8                | 1.9                                | 256.3                          |
| Summer | 1000.7                           | 72.6                        | 26.7                | 1.4                                | 586.0                          |
| Autumn | 1014.6                           | 71.0                        | 19.5                | 1.7                                | 218.5                          |
| Winter | 1027.0                           | 63.9                        | 5.7                 | 1.7                                | 82.1                           |

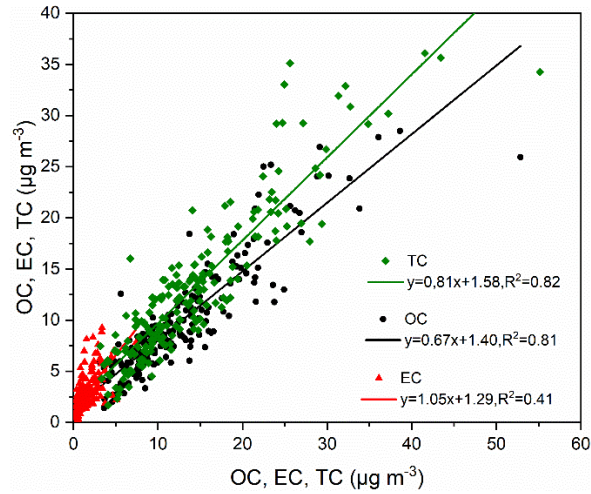

**Figure S1.** Correlations between the real-time OC, EC and TC concentrations (y-axis) and sampling OC, EC and TC concentrations (x-axis) during the corresponding periods.

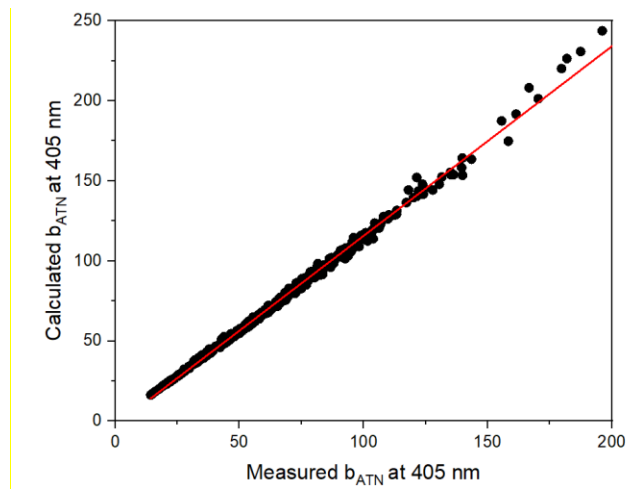

**Figure S2.** Measured  $b_{\text{ATN}}$  at 405 nm compared with  $b_{\text{ATN}}$  fitted from Eq. (3) using a two-component model.

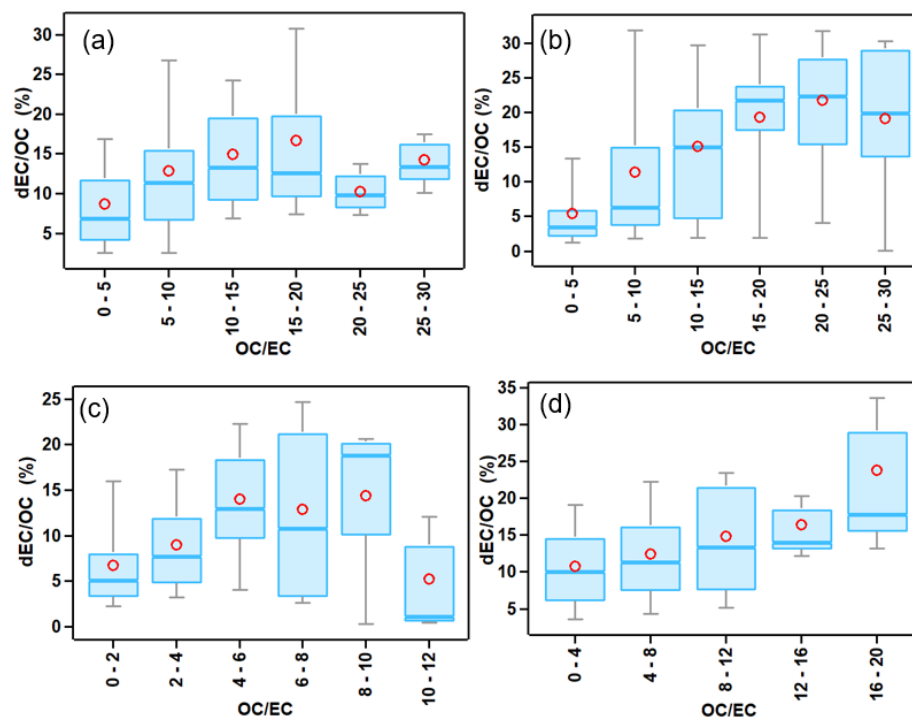

**Figure S3.**  $dEC/OC$  variation at different intervals of  $OC/EC$  ratios in spring (a), summer (b), autumn (c) and winter (d).

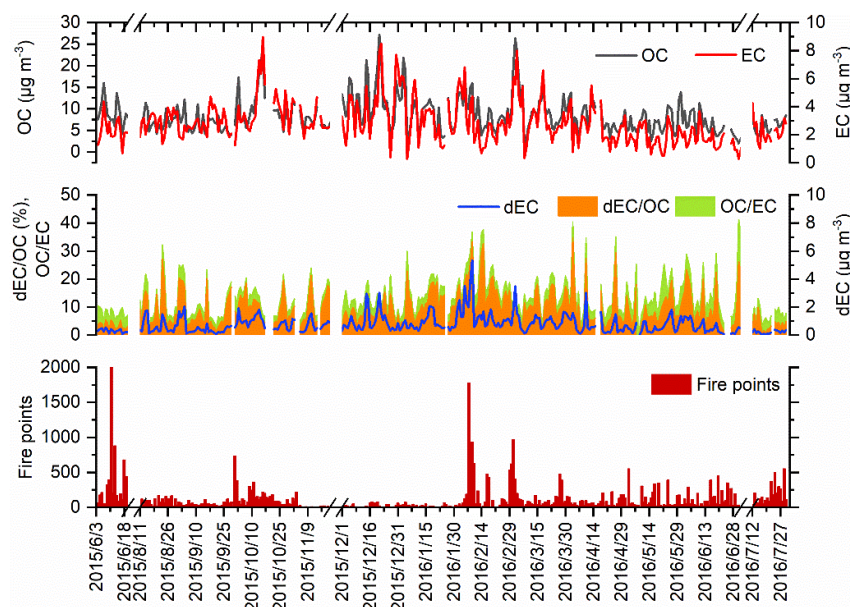

**Figure S4.** Time variations of  $OC$ ,  $EC$ ,  $dEC$ ,  $dEC/OC$ ,  $OC/EC$  and fire points obtained from the Fire Information for Resource Management System (FIRMS) derived from the Moderate Resolution Imaging Spectroradiometer (MODIS).

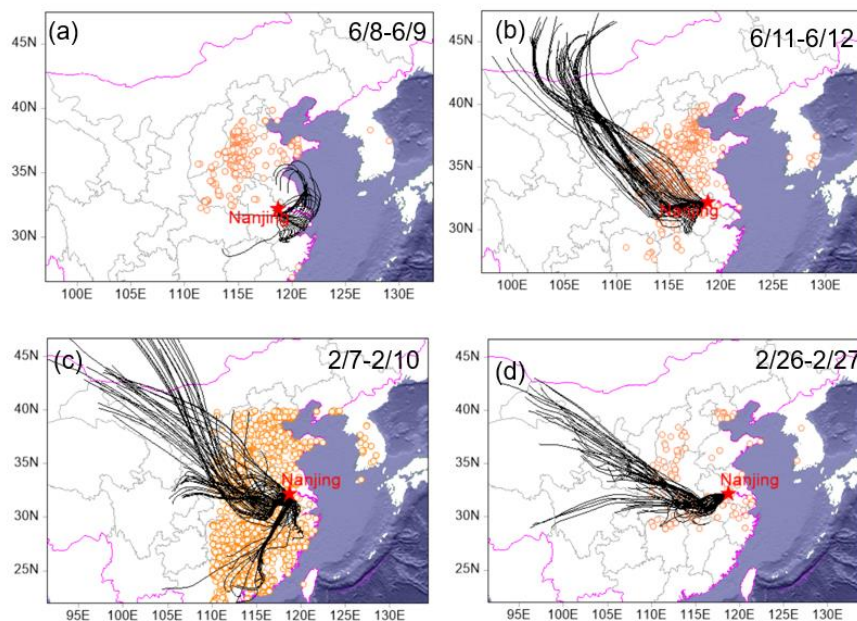

**Figure S5.** 48-h back trajectories at 500 m from the study site from 8 June 2015 to 9 June 2015(a), 11 June 2015 to 12 June 2015 (b), respectively and from 7 February 2016 to 10 February 2016 (c) and 26 February 2016 to 27 February 2016 (d), respectively.

## References

- Chen, D., Cui, H., Zhao, Y., Yin, L., Lu, Y., and Wang, Q.: A two-year study of carbonaceous aerosols in ambient PM<sub>2.5</sub> at a regional background site for western Yangtze River Delta, China, *Atmos. Res.*, 183, 351-361, 10.1016/j.atmosres.2016.09.004, 2017.
- Chen, Y., Xie, S., Luo, B., and Zhai, C.: Characteristics and origins of carbonaceous aerosol in the Sichuan Basin, China, *Atmos. Environ.*, 94, 215-223, 10.1016/j.atmosenv.2014.05.037, 2014.
- Escudero, M., Viana, M., Querol, X., Alastuey, A., Diez Hernandez, P., Garcia Dos Santos, S., and Anzano, J.: Industrial sources of primary and secondary organic aerosols in two urban environments in Spain, *Environ. Sci. Pollut. Res. Int.*, 22, 10413-10424, 10.1007/s11356-015-4228-x, 2015.
- Feng, Y., Chen, Y., Guo, H., Zhi, G., Xiong, S., Li, J., Sheng, G., and Fu, J.: Characteristics of organic and elemental carbon in PM<sub>2.5</sub> samples in Shanghai, China, *Atmos. Res.*, 92, 434-442, 10.1016/j.atmosres.2009.01.003, 2009.
- Jeong, C.-H., Lee, D.-W., Kim, E., and Hopke, P. K.: Measurement of real-time PM<sub>2.5</sub> mass, sulfate, and carbonaceous aerosols at the multiple monitoring sites, *Atmos. Environ.*, 38, 5247-5256, 10.1016/j.atmosenv.2003.12.046, 2004.



791 Ji, D., Zhang, J., He, J., Wang, X., BoPanga, Liua, Z., Wang, L., and Wang, Y.: Characteristics of  
792 atmospheric organic and elemental carbon aerosols in urban Beijing, China, *Atmos. Environ.*, 293-  
793 306, 10.1016/j.atmosenv.2015.11.020, 2016.

794 Lai, S., Zhao, Y., Ding, A., Zhang, Y., Song, T., Zheng, J., Ho, K. F., Lee, S.-C., and Zhong, L.:  
795 Characterization of PM 2.5 and the major chemical components during a 1-year campaign in rural  
796 Guangzhou, Southern China, *Atmos. Res.*, 167, 208-215, 10.1016/j.atmosres.2015.08.007, 2016.

797 Tiwari, S., Srivastava, A. K., Bisht, D. S., Safai, P. D., and Parmita, P.: Assessment of carbonaceous  
798 aerosol over Delhi in the Indo-Gangetic Basin: characterization, sources and temporal variability,  
799 *Nat. Hazards.*, 65, 1745-1764, 10.1007/s11069-012-0449-1, 2012.

800 Yu, X. Y., Cary, R. A., and Laulainen, N. S.: Primary and secondary organic carbon downwind of  
801 Mexico City, *Atmos. Chem. Phys.*, 9, 6793–6814, 2009.

802 Zhou, S., Wang, Z., Gao, R., Xue, L., Yuan, C., Wang, T., Gao, X., Wang, X., Nie, W., Xu, Z.,  
803 Zhang, Q., and Wang, W.: Formation of secondary organic carbon and long-range transport of  
804 carbonaceous aerosols at Mount Heng in South China, *Atmospheric Environment*, 63, 203-212,  
805 10.1016/j.atmosenv.2012.09.021, 2012.

806
